# Supplementary material for: The pH Robustness of Bacterial Sensing
Source: PubMed Central journal article supplement (PMC9600550; doi:10.1128/mbio.01650-22), 2022-09-26
Supplement: mbio.01650-22-s0001.pdf [file mbio.01650-22-s0001.pdf]

**Table S1) Buffers used for microcalorimetric studies.** Composition of the dialysis buffers used for each of the proteins analysed. Dialyzed proteins were transferred into the microcalorimeter and ligand solutions were made up in dialysis buffer.

| <b>pH</b>                                                | <b>Buffer composition</b>                                                                    |
|----------------------------------------------------------|----------------------------------------------------------------------------------------------|
| <b>Periplasmic LBDs, <math>\alpha/\beta</math> folds</b> |                                                                                              |
| <b>CtpM-LBD</b>                                          |                                                                                              |
| 4.0                                                      | 10 mM citric acid/sodium citrate, 150 mM NaCl, 10 % (v/v) glycerol                           |
| 4.5                                                      | 10 mM citric acid/sodium citrate, 150 mM NaCl, 10 % (v/v) glycerol                           |
| 5.0                                                      | 10 mM citric acid/sodium citrate, 150 mM NaCl, 10 % (v/v) glycerol                           |
| 5.5                                                      | 10 mM citric acid/sodium citrate, 150 mM NaCl, 10 % (v/v) glycerol                           |
| 6.0                                                      | 3 mM Tris, 3 mM PIPES, 3 mM MES, 150 mM NaCl, 10 % (v/v) glycerol                            |
| 6.5                                                      | 3 mM Tris, 3 mM PIPES, 3 mM MES, 150 mM NaCl, 10 % (v/v) glycerol                            |
| 7.0                                                      | 3 mM Tris, 3 mM PIPES, 3 mM MES, 150 mM NaCl, 10 % (v/v) glycerol                            |
| 7.5                                                      | 3 mM Tris, 3 mM PIPES, 3 mM MES, 150 mM NaCl, 10 % (v/v) glycerol                            |
| 8.0                                                      | 3 mM Tris, 3 mM PIPES, 3 mM MES, 150 mM NaCl, 10 % (v/v) glycerol                            |
| 8.5                                                      | 3 mM Tris, 3 mM PIPES, 3 mM MES, 150 mM NaCl, 10 % (v/v) glycerol                            |
| 9.0                                                      | 3 mM Tris, 3 mM PIPES, 3 mM MES, 150 mM NaCl, 10 % (v/v) glycerol                            |
| 9.5                                                      | 10 mM Na <sub>2</sub> CO <sub>3</sub> /NaHCO <sub>3</sub> , 150 mM NaCl, 10 % (v/v) glycerol |
| <b>McpV-LBD</b>                                          |                                                                                              |
| 4.0                                                      | 10 mM citric acid/sodium citrate, 150 mM NaCl, 10 % (v/v) glycerol                           |
| 4.5                                                      | 10 mM citric acid/sodium citrate, 150 mM NaCl, 10 % (v/v) glycerol                           |
| 5.0                                                      | 10 mM citric acid/sodium citrate, 150 mM NaCl, 10 % (v/v) glycerol                           |
| 6.0                                                      | 3 mM Tris, 3 mM PIPES, 3 mM MES, 150 mM NaCl, 10 % (v/v) glycerol                            |
| 7.0                                                      | 3 mM Tris, 3 mM PIPES, 3 mM MES, 150 mM NaCl, 10 % (v/v) glycerol                            |
| 8.0                                                      | 3 mM Tris, 3 mM PIPES, 3 mM MES, 150 mM NaCl, 10 % (v/v) glycerol                            |
| 9.0                                                      | 3 mM Tris, 3 mM PIPES, 3 mM MES, 150 mM NaCl, 10 % (v/v) glycerol                            |
| 10.0                                                     | 10 mM Na <sub>2</sub> CO <sub>3</sub> /NaHCO <sub>3</sub> , 150 mM NaCl, 10 % (v/v) glycerol |
| 11.0                                                     | 10 mM Na <sub>2</sub> CO <sub>3</sub> /NaHCO <sub>3</sub> , 150 mM NaCl, 10 % (v/v) glycerol |
| 11.5                                                     | 10 mM Na <sub>2</sub> PO <sub>4</sub> /NaOH, 150 mM NaCl, 10 % (v/v) glycerol                |
| 12.0                                                     | 10 mM KCl/NaOH, 150 mM NaCl, 10 % (v/v) glycerol                                             |
| <b>McpH-LBD</b>                                          |                                                                                              |
| 3.0                                                      | 10 mM citric acid/sodium citrate                                                             |
| 3.5                                                      | 10 mM citric acid/sodium citrate                                                             |
| 4.0                                                      | 10 mM citric acid/sodium citrate                                                             |
| 5.0                                                      | 10 mM citric acid/sodium citrate                                                             |
| 6.0                                                      | 3 mM Tris, 3 mM PIPES, 3 mM MES                                                              |
| 7.0                                                      | 3 mM Tris, 3 mM PIPES, 3 mM MES                                                              |
| 8.0                                                      | 3 mM Tris, 3 mM PIPES, 3 mM MES                                                              |
| 9.0                                                      | 3 mM Tris, 3 mM PIPES, 3 mM MES                                                              |
| 10.0                                                     | 10 mM Na <sub>2</sub> CO <sub>3</sub> /NaHCO <sub>3</sub>                                    |
| 10.5                                                     | 10 mM Na <sub>2</sub> CO <sub>3</sub> /NaHCO <sub>3</sub>                                    |
| <b>PctA-LBD</b>                                          |                                                                                              |
| 2.5                                                      | 20 mM acetic acid/HCl                                                                        |
| 3.0                                                      | 10 mM citric acid/sodium citrate, 150 mM NaCl, 10 % (v/v) glycerol                           |
| 3.5                                                      | 10 mM citric acid/sodium citrate, 150 mM NaCl, 10 % (v/v) glycerol                           |
| 4.0                                                      | 10 mM citric acid/sodium citrate, 150 mM NaCl, 10 % (v/v) glycerol                           |
| 4.5                                                      | 10 mM citric acid/sodium citrate, 150 mM NaCl, 10 % (v/v) glycerol                           |
| 5.0                                                      | 10 mM citric acid/sodium citrate, 150 mM NaCl, 10 % (v/v) glycerol                           |
| 5.5                                                      | 10 mM citric acid/sodium citrate, 150 mM NaCl, 10 % (v/v) glycerol                           |
| 6.0                                                      | 3 mM Tris, 3 mM PIPES, 3 mM MES, 150 mM NaCl, 10 % (v/v) glycerol                            |
| 6.5                                                      | 3 mM Tris, 3 mM PIPES, 3 mM MES, 150 mM NaCl, 10 % (v/v) glycerol                            |
| 7.0                                                      | 3 mM Tris, 3 mM PIPES, 3 mM MES, 150 mM NaCl, 10 % (v/v) glycerol                            |

|                                                  |                                                                                              |
|--------------------------------------------------|----------------------------------------------------------------------------------------------|
| 7.5                                              | 3 mM Tris, 3 mM PIPES, 3 mM MES, 150 mM NaCl, 10 % (v/v) glycerol                            |
| 8.0                                              | 3 mM Tris, 3 mM PIPES, 3 mM MES, 150 mM NaCl, 10 % (v/v) glycerol                            |
| 8.5                                              | 3 mM Tris, 3 mM PIPES, 3 mM MES, 150 mM NaCl, 10 % (v/v) glycerol                            |
| 9.0                                              | 3 mM Tris, 3 mM PIPES, 3 mM MES, 150 mM NaCl, 10 % (v/v) glycerol                            |
| 9.5                                              | 10 mM Na <sub>2</sub> CO <sub>3</sub> /NaHCO <sub>3</sub> , 150 mM NaCl, 10 % (v/v) glycerol |
| 10.0                                             | 10 mM Na <sub>2</sub> CO <sub>3</sub> /NaHCO <sub>3</sub> , 150 mM NaCl, 10 % (v/v) glycerol |
| 10.5                                             | 10 mM Na <sub>2</sub> CO <sub>3</sub> /NaHCO <sub>3</sub> , 150 mM NaCl, 10 % (v/v) glycerol |
| 11.0                                             | 10 mM Na <sub>2</sub> PO <sub>4</sub> /NaOH, 150 mM NaCl, 10 % (v/v) glycerol                |
| 11.5                                             | 10 mM Na <sub>2</sub> PO <sub>4</sub> /NaOH, 150 mM NaCl, 10 % (v/v) glycerol                |
| 12.0                                             | 10 mM Na <sub>2</sub> PO <sub>4</sub> /NaOH, 150 mM NaCl, 10 % (v/v) glycerol                |
| <b>McpU-LBD</b>                                  |                                                                                              |
| 4.0                                              | 10 mM citric acid/sodium citrate, 150 mM NaCl, 10 % (v/v) glycerol                           |
| 4.5                                              | 10 mM citric acid/sodium citrate, 150 mM NaCl, 10 % (v/v) glycerol                           |
| 5.0                                              | 10 mM citric acid/sodium citrate, 150 mM NaCl, 10 % (v/v) glycerol                           |
| 5.5                                              | 10 mM citric acid/sodium citrate, 150 mM NaCl, 10 % (v/v) glycerol                           |
| 6.0                                              | 3 mM Tris, 3 mM PIPES, 3 mM MES, 150 mM NaCl, 10 % (v/v) glycerol                            |
| 6.5                                              | 3 mM Tris, 3 mM PIPES, 3 mM MES, 150 mM NaCl, 10 % (v/v) glycerol                            |
| 7.0                                              | 3 mM Tris, 3 mM PIPES, 3 mM MES, 150 mM NaCl, 10 % (v/v) glycerol                            |
| 7.5                                              | 3 mM Tris, 3 mM PIPES, 3 mM MES, 150 mM NaCl, 10 % (v/v) glycerol                            |
| 8.0                                              | 3 mM Tris, 3 mM PIPES, 3 mM MES, 150 mM NaCl, 10 % (v/v) glycerol                            |
| 8.5                                              | 3 mM Tris, 3 mM PIPES, 3 mM MES, 150 mM NaCl, 10 % (v/v) glycerol                            |
| 9.5                                              | 3 mM Tris, 3 mM PIPES, 3 mM MES, 150 mM NaCl, 10 % (v/v) glycerol                            |
| 10.0                                             | 10 mM Na <sub>2</sub> CO <sub>3</sub> /NaHCO <sub>3</sub> , 150 mM NaCl, 10 % (v/v) glycerol |
| 10.5                                             | 10 mM Na <sub>2</sub> CO <sub>3</sub> /NaHCO <sub>3</sub> , 150 mM NaCl, 10 % (v/v) glycerol |
| 11.0                                             | 10 mM Na <sub>2</sub> CO <sub>3</sub> /NaHCO <sub>3</sub> , 150 mM NaCl, 10 % (v/v) glycerol |
| 11.5                                             | 10 mM Na <sub>2</sub> PO <sub>4</sub> /NaOH, 150 mM NaCl, 10 % (v/v) glycerol                |
| 12.0                                             | 10 mM Na <sub>2</sub> PO <sub>4</sub> /NaOH, 150 mM NaCl, 10 % (v/v) glycerol                |
| <b>Periplasmic LBDs, four-helix bundle folds</b> |                                                                                              |
| <b>Tar-LBD</b>                                   |                                                                                              |
| 2.5                                              | 20 mM acetic acid/HCl                                                                        |
| 3.0                                              | 10 mM citric acid/sodium citrate                                                             |
| 3.5                                              | 10 mM citric acid/sodium citrate                                                             |
| 4.0                                              | 10 mM citric acid/sodium citrate                                                             |
| 4.5                                              | 10 mM citric acid/sodium citrate                                                             |
| 5.0                                              | 10 mM citric acid/sodium citrate                                                             |
| 5.5                                              | 10 mM citric acid/sodium citrate                                                             |
| 6.0                                              | 3 mM Tris, 3 mM PIPES, 3 mM MES                                                              |
| 6.5                                              | 3 mM Tris, 3 mM PIPES, 3 mM MES                                                              |
| 7.0                                              | 3 mM Tris, 3 mM PIPES, 3 mM MES                                                              |
| 7.5                                              | 3 mM Tris, 3 mM PIPES, 3 mM MES                                                              |
| 8.0                                              | 3 mM Tris, 3 mM PIPES, 3 mM MES                                                              |
| 8.5                                              | 3 mM Tris, 3 mM PIPES, 3 mM MES                                                              |
| 9.0                                              | 3 mM Tris, 3 mM PIPES, 3 mM MES                                                              |
| 9.5                                              | 10 mM Na <sub>2</sub> CO <sub>3</sub> /NaHCO <sub>3</sub>                                    |
| 10.0                                             | 10 mM Na <sub>2</sub> CO <sub>3</sub> /NaHCO <sub>3</sub>                                    |
| 10.5                                             | 10 mM Na <sub>2</sub> CO <sub>3</sub> /NaHCO <sub>3</sub>                                    |
| 11.0                                             | 10 mM Na <sub>2</sub> CO <sub>3</sub> /NaHCO <sub>3</sub>                                    |
| <b>PcaY_PP-LBD</b>                               |                                                                                              |
| 3.0                                              | 10 mM citric acid/sodium citrate                                                             |
| 3.5                                              | 10 mM citric acid/sodium citrate                                                             |
| 4.0                                              | 10 mM citric acid/sodium citrate                                                             |
| 5.0                                              | 10 mM citric acid/sodium citrate                                                             |
| 6.0                                              | 3 mM Tris, 3 mM PIPES, 3 mM MES                                                              |

|                                            |                                                                                     |
|--------------------------------------------|-------------------------------------------------------------------------------------|
| 7.0                                        | 3 mM Tris, 3 mM PIPES, 3 mM MES                                                     |
| 8.0                                        | 3 mM Tris, 3 mM PIPES, 3 mM MES                                                     |
| 9.0                                        | 3 mM Tris, 3 mM PIPES, 3 mM MES                                                     |
| 10.0                                       | 10 mM Na <sub>2</sub> CO <sub>3</sub> /NaHCO <sub>3</sub>                           |
| 11.0                                       | 10 mM Na <sub>2</sub> CO <sub>3</sub> /NaHCO <sub>3</sub>                           |
| 11.5                                       | 10 mM KCl/NaOH                                                                      |
| 12.0                                       | 10 mM KCl/NaOH                                                                      |
| <b>McpS-LBD</b>                            |                                                                                     |
| 2.5                                        | 20 mM acetic acid/HCl                                                               |
| 3.0                                        | 10 mM citric acid/sodium citrate                                                    |
| 3.5                                        | 10 mM citric acid/sodium citrate                                                    |
| 4.0                                        | 10 mM citric acid/sodium citrate                                                    |
| 4.5                                        | 10 mM citric acid/sodium citrate                                                    |
| 5.0                                        | 10 mM citric acid/sodium citrate                                                    |
| 5.5                                        | 10 mM citric acid/sodium citrate                                                    |
| 6.0                                        | 3 mM Tris, 3 mM PIPES, 3 mM MES                                                     |
| 6.5                                        | 3 mM Tris, 3 mM PIPES, 3 mM MES                                                     |
| 7.0                                        | 3 mM Tris, 3 mM PIPES, 3 mM MES                                                     |
| 7.5                                        | 3 mM Tris, 3 mM PIPES, 3 mM MES                                                     |
| 8.0                                        | 3 mM Tris, 3 mM PIPES, 3 mM MES                                                     |
| 8.5                                        | 3 mM Tris, 3 mM PIPES, 3 mM MES                                                     |
| 9.0                                        | 3 mM Tris, 3 mM PIPES, 3 mM MES                                                     |
| 9.5                                        | 10 mM Na <sub>2</sub> CO <sub>3</sub> /NaHCO <sub>3</sub>                           |
| 10.0                                       | 10 mM Na <sub>2</sub> CO <sub>3</sub> /NaHCO <sub>3</sub>                           |
| 10.5                                       | 10 mM Na <sub>2</sub> CO <sub>3</sub> /NaHCO <sub>3</sub>                           |
| <b>McpQ-LBD</b>                            |                                                                                     |
| 3.5                                        | 10 mM acetic acid/ sodium acetate, 10 mM MgCl <sub>2</sub>                          |
| 4.0                                        | 10 mM acetic acid/ sodium acetate, 10 mM MgCl <sub>2</sub>                          |
| 5.0                                        | 10 mM acetic acid/ sodium acetate, 10 mM MgCl <sub>2</sub>                          |
| 6.0                                        | 3 mM Tris, 3 mM PIPES, 3 mM MES, 10 mM MgCl <sub>2</sub>                            |
| 7.0                                        | 3 mM Tris, 3 mM PIPES, 3 mM MES, 10 mM MgCl <sub>2</sub>                            |
| 8.0                                        | 3 mM Tris, 3 mM PIPES, 3 mM MES, 10 mM MgCl <sub>2</sub>                            |
| 9.0                                        | 3 mM Tris, 3 mM PIPES, 3 mM MES, 10 mM MgCl <sub>2</sub>                            |
| 10.0                                       | 10 mM Na <sub>2</sub> CO <sub>3</sub> /NaHCO <sub>3</sub> , 10 mM MgCl <sub>2</sub> |
| 11.0                                       | 10 mM Na <sub>2</sub> CO <sub>3</sub> /NaHCO <sub>3</sub> , 10 mM MgCl <sub>2</sub> |
| 11.5                                       | 10 mM KCl/NaOH, 10 mM MgCl <sub>2</sub>                                             |
| <b>Periplasmic solute binding proteins</b> |                                                                                     |
| <b>E6B08 RS28125</b>                       |                                                                                     |
| 2.5                                        | 20 mM acetic acid/HCl                                                               |
| 3.0                                        | 10 mM citric acid/sodium citrate                                                    |
| 4.0                                        | 10 mM citric acid/sodium citrate                                                    |
| 5.0                                        | 10 mM citric acid/sodium citrate                                                    |
| 6.0                                        | 3 mM Tris, 3 mM PIPES, 3 mM MES                                                     |
| 7.0                                        | 3 mM Tris, 3 mM PIPES, 3 mM MES                                                     |
| 8.0                                        | 3 mM Tris, 3 mM PIPES, 3 mM MES                                                     |
| 9.0                                        | 3 mM Tris, 3 mM PIPES, 3 mM MES                                                     |
| 10.0                                       | 10 mM Na <sub>2</sub> CO <sub>3</sub> /NaHCO <sub>3</sub>                           |
| 11.0                                       | 10 mM Na <sub>2</sub> CO <sub>3</sub> /NaHCO <sub>3</sub>                           |
| 11.5                                       | 10 mM Na <sub>2</sub> HPO <sub>4</sub> /NaOH                                        |
| <b>MBP</b>                                 |                                                                                     |
| 2.0                                        | 20 mM acetic acid/HCl                                                               |
| 2.5                                        | 20 mM acetic acid/HCl                                                               |
| 3.0                                        | 10 mM citric acid/sodium citrate                                                    |

|                       |                                                                                                                                              |
|-----------------------|----------------------------------------------------------------------------------------------------------------------------------------------|
| 4.0                   | 10 mM citric acid/sodium citrate                                                                                                             |
| 5.0                   | 10 mM citric acid/sodium citrate                                                                                                             |
| 6.0                   | 3 mM Tris, 3 mM PIPES, 3 mM MES                                                                                                              |
| 7.0                   | 3 mM Tris, 3 mM PIPES, 3 mM MES                                                                                                              |
| 8.0                   | 3 mM Tris, 3 mM PIPES, 3 mM MES                                                                                                              |
| 9.0                   | 3 mM Tris, 3 mM PIPES, 3 mM MES                                                                                                              |
| 10.0                  | 10 mM Na <sub>2</sub> CO <sub>3</sub> /NaHCO <sub>3</sub>                                                                                    |
| 11.0                  | 10 mM Na <sub>2</sub> CO <sub>3</sub> /NaHCO <sub>3</sub>                                                                                    |
| 11.5                  | 10 mM Na <sub>2</sub> HPO <sub>4</sub> /NaOH                                                                                                 |
| <b>Cytosolic LBDs</b> |                                                                                                                                              |
| <b>TodS-Nter</b>      |                                                                                                                                              |
| 5.0                   | 10 mM citric acid/sodium citrate, 2 mM DDT, 2 mM MgCl <sub>2</sub> , 0.1 mM EDTA                                                             |
| 5.5                   | 10 mM citric acid/sodium citrate, 2 mM DDT, 2 mM MgCl <sub>2</sub> , 0.1 mM EDTA                                                             |
| 6.0                   | 3 mM Tris, 3 mM PIPES, 3 mM MES, 2 mM DDT, 2 mM MgCl <sub>2</sub> , 0.1 mM EDTA                                                              |
| 6.5                   | 3 mM Tris, 3 mM PIPES, 3 mM MES, 2 mM DDT, 2 mM MgCl <sub>2</sub> , 0.1 mM EDTA                                                              |
| 7.0                   | 3 mM Tris, 3 mM PIPES, 3 mM MES, 2 mM DDT, 2 mM MgCl <sub>2</sub> , 0.1 mM EDTA                                                              |
| 7.5                   | 3 mM Tris, 3 mM PIPES, 3 mM MES, 2 mM DDT, 2 mM MgCl <sub>2</sub> , 0.1 mM EDTA                                                              |
| 8.0                   | 3 mM Tris, 3 mM PIPES, 3 mM MES, 2 mM DDT, 2 mM MgCl <sub>2</sub> , 0.1 mM EDTA                                                              |
| 8.5                   | 3 mM Tris, 3 mM PIPES, 3 mM MES, 2 mM DDT, 2 mM MgCl <sub>2</sub> , 0.1 mM EDTA                                                              |
| 9.0                   | 3 mM Tris, 3 mM PIPES, 3 mM MES, 2 mM DDT, 2 mM MgCl <sub>2</sub> , 0.1 mM EDTA                                                              |
| 9.5                   | 10 mM Na <sub>2</sub> CO <sub>3</sub> /NaHCO <sub>3</sub> , 2 mM DDT, 2 mM MgCl <sub>2</sub> , 0.1 mM EDTA                                   |
| 10.0                  | 10 mM Na <sub>2</sub> CO <sub>3</sub> /NaHCO <sub>3</sub> , 2 mM DDT, 2 mM MgCl <sub>2</sub> , 0.1 mM EDTA                                   |
| <b>AdmX-LBD</b>       |                                                                                                                                              |
| 7.0                   | 3 mM Tris, 3 mM PIPES, 3 mM MES, 1 mM 2-mercaptoethanol                                                                                      |
| 7.5                   | 3 mM Tris, 3 mM PIPES, 3 mM MES, 1 mM 2-mercaptoethanol                                                                                      |
| 8.0                   | 3 mM Tris, 3 mM PIPES, 3 mM MES, 1 mM 2-mercaptoethanol                                                                                      |
| 8.5                   | 3 mM Tris, 3 mM PIPES, 3 mM MES, 1 mM 2-mercaptoethanol                                                                                      |
| <b>TtgV</b>           |                                                                                                                                              |
| 4.5                   | 10 mM citric acid/sodium citrate, 100 mM NaCl, 10 % (v/v) glycerol, 1 mM 2-mercaptoethanol, 8 mM magnesium acetate                           |
| 5.0                   | 10 mM citric acid/sodium citrate, 100 mM NaCl, 10 % (v/v) glycerol, 1 mM 2-mercaptoethanol, 8 mM magnesium acetate                           |
| 6.0                   | 3 mM Tris, 3 mM PIPES, 3 mM MES, 100 mM NaCl, 10 % (v/v) glycerol, 1 mM 2-mercaptoethanol, 8 mM magnesium acetate                            |
| 7.0                   | 3 mM Tris, 3 mM PIPES, 3 mM MES, 100 mM NaCl, 10 % (v/v) glycerol, 1 mM 2-mercaptoethanol, 8 mM magnesium acetate                            |
| 8.0                   | 3 mM Tris, 3 mM PIPES, 3 mM MES, 100 mM NaCl, 10 % (v/v) glycerol, 1 mM 2-mercaptoethanol, 8 mM magnesium acetate                            |
| 9.0                   | 3 mM Tris, 3 mM PIPES, 3 mM MES, 100 mM NaCl, 10 % (v/v) glycerol, 1 mM 2-mercaptoethanol, 8 mM magnesium acetate                            |
| 10.0                  | 10 mM Na <sub>2</sub> CO <sub>3</sub> /NaHCO <sub>3</sub> , 100 mM NaCl, 10 % (v/v) glycerol, 1 mM 2-mercaptoethanol, 8 mM magnesium acetate |
