# Supplementary material for: The pH Robustness of Bacterial Sensing
Source: PubMed Central journal article supplement (PMC9600550; doi:10.1128/mbio.01650-22), 2022-09-26
Supplement: mbio.01650-22-s0002.pdf [file mbio.01650-22-s0002.pdf]

**Table S2. Dissociation constants derived from the microcalorimetric titrations of different proteins with ligands.** SD: standard deviation. The pH optima are highlighted.

| LBDs of periplasmic location, $\alpha/\beta$ folds |                  |          |                  |          |                  |            |                  |            |                  |            |
|----------------------------------------------------|------------------|----------|------------------|----------|------------------|------------|------------------|------------|------------------|------------|
|                                                    | CtpM-LBD         |          | McpV-LBD         |          | McpH-LBD         |            | PctA-LBD         |            | McpU-LBD         |            |
| pH                                                 | $K_D$ ( $\mu$ M) | SD       | $K_D$ ( $\mu$ M) | SD       | $K_D$ ( $\mu$ M) | SD         | $K_D$ ( $\mu$ M) | SD         | $K_D$ ( $\mu$ M) | SD         |
| 2.5                                                |                  |          |                  |          |                  |            |                  |            |                  |            |
| 3.0                                                |                  |          |                  |          |                  |            | 1.33             | 0.3        |                  |            |
| 3.5                                                |                  |          |                  |          | 0.80             | 0.2        | 0.86             | 0.2        |                  |            |
| 4.0                                                |                  |          |                  |          | 6.85             | 1          | 1.38             | 0.3        |                  |            |
| 4.5                                                | 147              | 122      |                  |          |                  |            | 0.69             | 0.1        | 78.8             | 21         |
| 5.0                                                | 136              | 32       | 55.3             | 5        | <b>1.68</b>      | <b>0.3</b> | 0.98             | 0.1        | 9.90             | 0.2        |
| 5.5                                                | 49.7             | 3        |                  |          |                  |            | <b>0.59</b>      | <b>0.1</b> | 3.70             | 0.1        |
| 6.0                                                | 39.5             | 2        | 119              | 9        | 2.61             | 0.4        | 0.87             | 0.1        | 1.87             | 0.1        |
| 6.5                                                | <b>38.7</b>      | <b>2</b> |                  |          |                  |            | 0.70             | 0.1        | 1.51             | 0.1        |
| 7.0                                                | 44.0             | 2        | <b>33.1</b>      | <b>3</b> | 1.91             | 0.1        | 1.82             | 0.2        | 1.07             | 0.1        |
| 7.5                                                | 80.0             | 6        |                  |          |                  |            | 1.31             | 0.1        |                  |            |
| 8.0                                                | 55.0             | 2        | 84.7             | 7        | 1.86             | 0.2        | 0.87             | 0.1        | 0.93             | 0.1        |
| 8.5                                                | 86.4             | 10       |                  |          |                  |            | 1.32             | 0.2        | <b>0.70</b>      | <b>0.1</b> |
| 9.0                                                | 145              | 20       | 53.8             | 3        | 3.61             | 0.1        | 0.92             | 0.1        | 0.80             | 0.1        |
| 9.5                                                |                  |          |                  |          |                  |            | 1.20             | 0.1        | 1.22             | 0.1        |
| 10.0                                               |                  |          | 70.4             | 9        | 35.7             | 2          | 1.27             | 0.1        | 2.35             | 0.1        |
| 10.5                                               |                  |          |                  |          |                  |            | 1.50             | 0.8        | 5.11             | 0.1        |
| 11.0                                               |                  |          | 79.4             | 6        |                  |            | 3.88             | 0.5        | 13.3             | 0.1        |
| 11.5                                               |                  |          | 641              | 68       |                  |            | 46.6             | 7          | 89.2             | 31         |

**LBDs of periplasmic location, four-helix bundle folds**

| pH   | Tar-LBD          |            | PcaY_PP-LBD      |            | McpS-LBD         |            | McpQ-LBD         |          |  |  |
|------|------------------|------------|------------------|------------|------------------|------------|------------------|----------|--|--|
|      | $K_D$ ( $\mu$ M) | SD         | $K_D$ ( $\mu$ M) | SD         | $K_D$ ( $\mu$ M) | SD         | $K_D$ ( $\mu$ M) | SD       |  |  |
| 2.5  |                  |            |                  |            |                  |            |                  |          |  |  |
| 3.0  | 19.4             | 3          |                  |            | 131              | 90         |                  |          |  |  |
| 3.5  | 1.80             | 0.1        | 95.4             | 5          | 113              | 32         |                  |          |  |  |
| 4.0  | 0.71             | 0.1        | 5.18             | 0.2        | 143              | 50         |                  |          |  |  |
| 4.5  | 0.46             | 0.1        |                  |            | 42.0             | 6          |                  |          |  |  |
| 5.0  | <b>0.40</b>      | <b>0.1</b> | <b>1.22</b>      | <b>0.1</b> | 50.0             | 7          | 840              | 59       |  |  |
| 5.5  | 0.98             | 0.1        |                  |            | <b>4.00</b>      | <b>0.4</b> |                  |          |  |  |
| 6.0  | 0.96             | 0.1        | 2.03             | 0.2        | 5.70             | 0.5        | <b>153</b>       | <b>5</b> |  |  |
| 6.5  | 1.10             | 0.1        |                  |            | 5.20             | 0.9        |                  |          |  |  |
| 7.0  | 1.64             | 0.1        | 1.52             | 0.3        | 20.0             | 1          | 308              | 59       |  |  |
| 7.5  | 2.20             | 0.1        |                  |            | 21.1             | 1          |                  |          |  |  |
| 8.0  | 3.20             | 0.1        | 4.78             | 0.4        | 14.4             | 0.4        | 505              | 28       |  |  |
| 8.5  | 3.30             | 0.2        |                  |            | 13.0             | 0.3        |                  |          |  |  |
| 9.0  | 3.90             | 0.2        | 8.77             | 0.3        | 14.4             | 0.7        | 699              | 42       |  |  |
| 9.5  | 4.70             | 0.2        |                  |            | 15.6             | 2          |                  |          |  |  |
| 10.0 | 16.1             | 2          | 12.2             | 1          | 12.5             | 9          | 406              | 30       |  |  |
| 10.5 | 40.7             | 20         |                  |            |                  |            |                  |          |  |  |
| 11.0 |                  |            | 86.2             | 9          |                  |            | 401              | 73       |  |  |
| 11.5 |                  |            | 510              | 53         |                  |            |                  |          |  |  |

**Periplasmic solute binding proteins**

| pH   | MBP              |            | E6B08_RS28125    |            |
|------|------------------|------------|------------------|------------|
|      | $K_D$ ( $\mu$ M) | SD         | $K_D$ ( $\mu$ M) | SD         |
| 2.5  | 26.3             | 1          |                  |            |
| 3.0  | 11.0             | 0.6        | 15.4             | 1          |
| 3.5  |                  |            |                  |            |
| 4.0  | 3.05             | 0.2        | 6.02             | 1          |
| 4.5  |                  |            |                  |            |
| 5.0  | 1.67             | 0.1        | 20.9             | 4          |
| 5.5  |                  |            |                  |            |
| 6.0  | 2.65             | 0.1        | 1.47             | 0.2        |
| 6.5  |                  |            |                  |            |
| 7.0  | 1.71             | 0.1        | 1.28             | 0.1        |
| 7.5  |                  |            |                  |            |
| 8.0  | 1.20             | 0.1        | 0.98             | 0.1        |
| 8.5  |                  |            |                  |            |
| 9.0  | <b>0.63</b>      | <b>0.1</b> | <b>0.66</b>      | <b>0.1</b> |
| 9.5  |                  |            |                  |            |
| 10.0 | 1.00             |            | 1.69             | 0.1        |
| 10.5 |                  |            |                  |            |
| 11.0 | 1.00             |            | 7.24             | 0.2        |
| 11.5 |                  |            |                  |            |

**LBDs of cytosolic location**

| pH   | TodS-Nter        |            | AdmX-LBD         |          | TtgV             |          |
|------|------------------|------------|------------------|----------|------------------|----------|
|      | $K_D$ ( $\mu$ M) | SD         | $K_D$ ( $\mu$ M) | SD       | $K_D$ ( $\mu$ M) | SD       |
| 2.5  |                  |            |                  |          |                  |          |
| 3.0  |                  |            |                  |          |                  |          |
| 3.5  |                  |            |                  |          |                  |          |
| 4.0  |                  |            |                  |          |                  |          |
| 4.5  |                  |            |                  |          |                  |          |
| 5.0  |                  |            |                  |          | 826              | 153      |
| 5.5  | 0.35             | 0.1        |                  |          |                  |          |
| 6.0  | 0.26             | 0.1        |                  |          | <b>67.6</b>      | <b>5</b> |
| 6.5  | <b>0.25</b>      | <b>0.1</b> |                  |          |                  |          |
| 7.0  | 0.26             | 0.1        |                  |          | 75.8             | 3        |
| 7.5  | 0.53             | 0.1        | 22.0             | 5        |                  |          |
| 8.0  | 0.79             | 0.1        | <b>12.7</b>      | <b>2</b> | 113              | 6        |
| 8.5  | 1.50             | 0.2        |                  |          |                  |          |
| 9.0  | 2.40             | 0.3        |                  |          | 102              | 15       |
| 9.5  | 1.90             | 0.3        |                  |          |                  |          |
| 10.0 |                  |            |                  |          |                  |          |
| 10.5 |                  |            |                  |          |                  |          |
| 11.0 |                  |            |                  |          |                  |          |
| 11.5 |                  |            |                  |          |                  |          |
