# Supplementary material for: The pH Robustness of Bacterial Sensing
Source: PubMed Central journal article supplement (PMC9600550; doi:10.1128/mbio.01650-22), 2022-09-26
Supplement: mbio.01650-22-s0003.pdf [file mbio.01650-22-s0003.pdf]

**Table S3) Thermodynamic parameters for the thermal unfolding of Tar-LBD at different pH in the absence and presence of 1 mM L-Asp.**

| <b>pH</b> | <b>Ligand</b> | <b>T<sub>m</sub> (°C)</b> | <b>ΔH (kcal/mol)</b> |
|-----------|---------------|---------------------------|----------------------|
| 3.5       | -             | 44.16                     | 157                  |
|           |               | 66.17                     | 34.8                 |
| 5.0       | -             | 41.71                     | 88.4                 |
| 7.0       | -             | 32.65                     | 53.0                 |
| 10.0      | -             | No unfolding events       |                      |
| 3.5       | 1 mM L-Asp    | 44.28                     | 184                  |
|           |               | 64.51                     | 8.7                  |
| 5.0       | 1 mM L-Asp    | 47.73                     | 106.4                |
| 7.0       | 1 mM L-Asp    | 36.48                     | 79.3                 |
|           |               | 42.20                     | 26.2                 |
| 10.0      | 1 mM L-Asp    | 35.11                     | 98.6                 |
