# Supplementary material for: The pH Robustness of Bacterial Sensing
Source: PubMed Central journal article supplement (PMC9600550; doi:10.1128/mbio.01650-22), 2022-09-26

**Fig S1. Microcalorimetric titrations of mono- and bimodular  $\alpha/\beta$  fold ligand binding domains with different ligands at different pH.**

**L-malate recognition by CtpM-LBD**

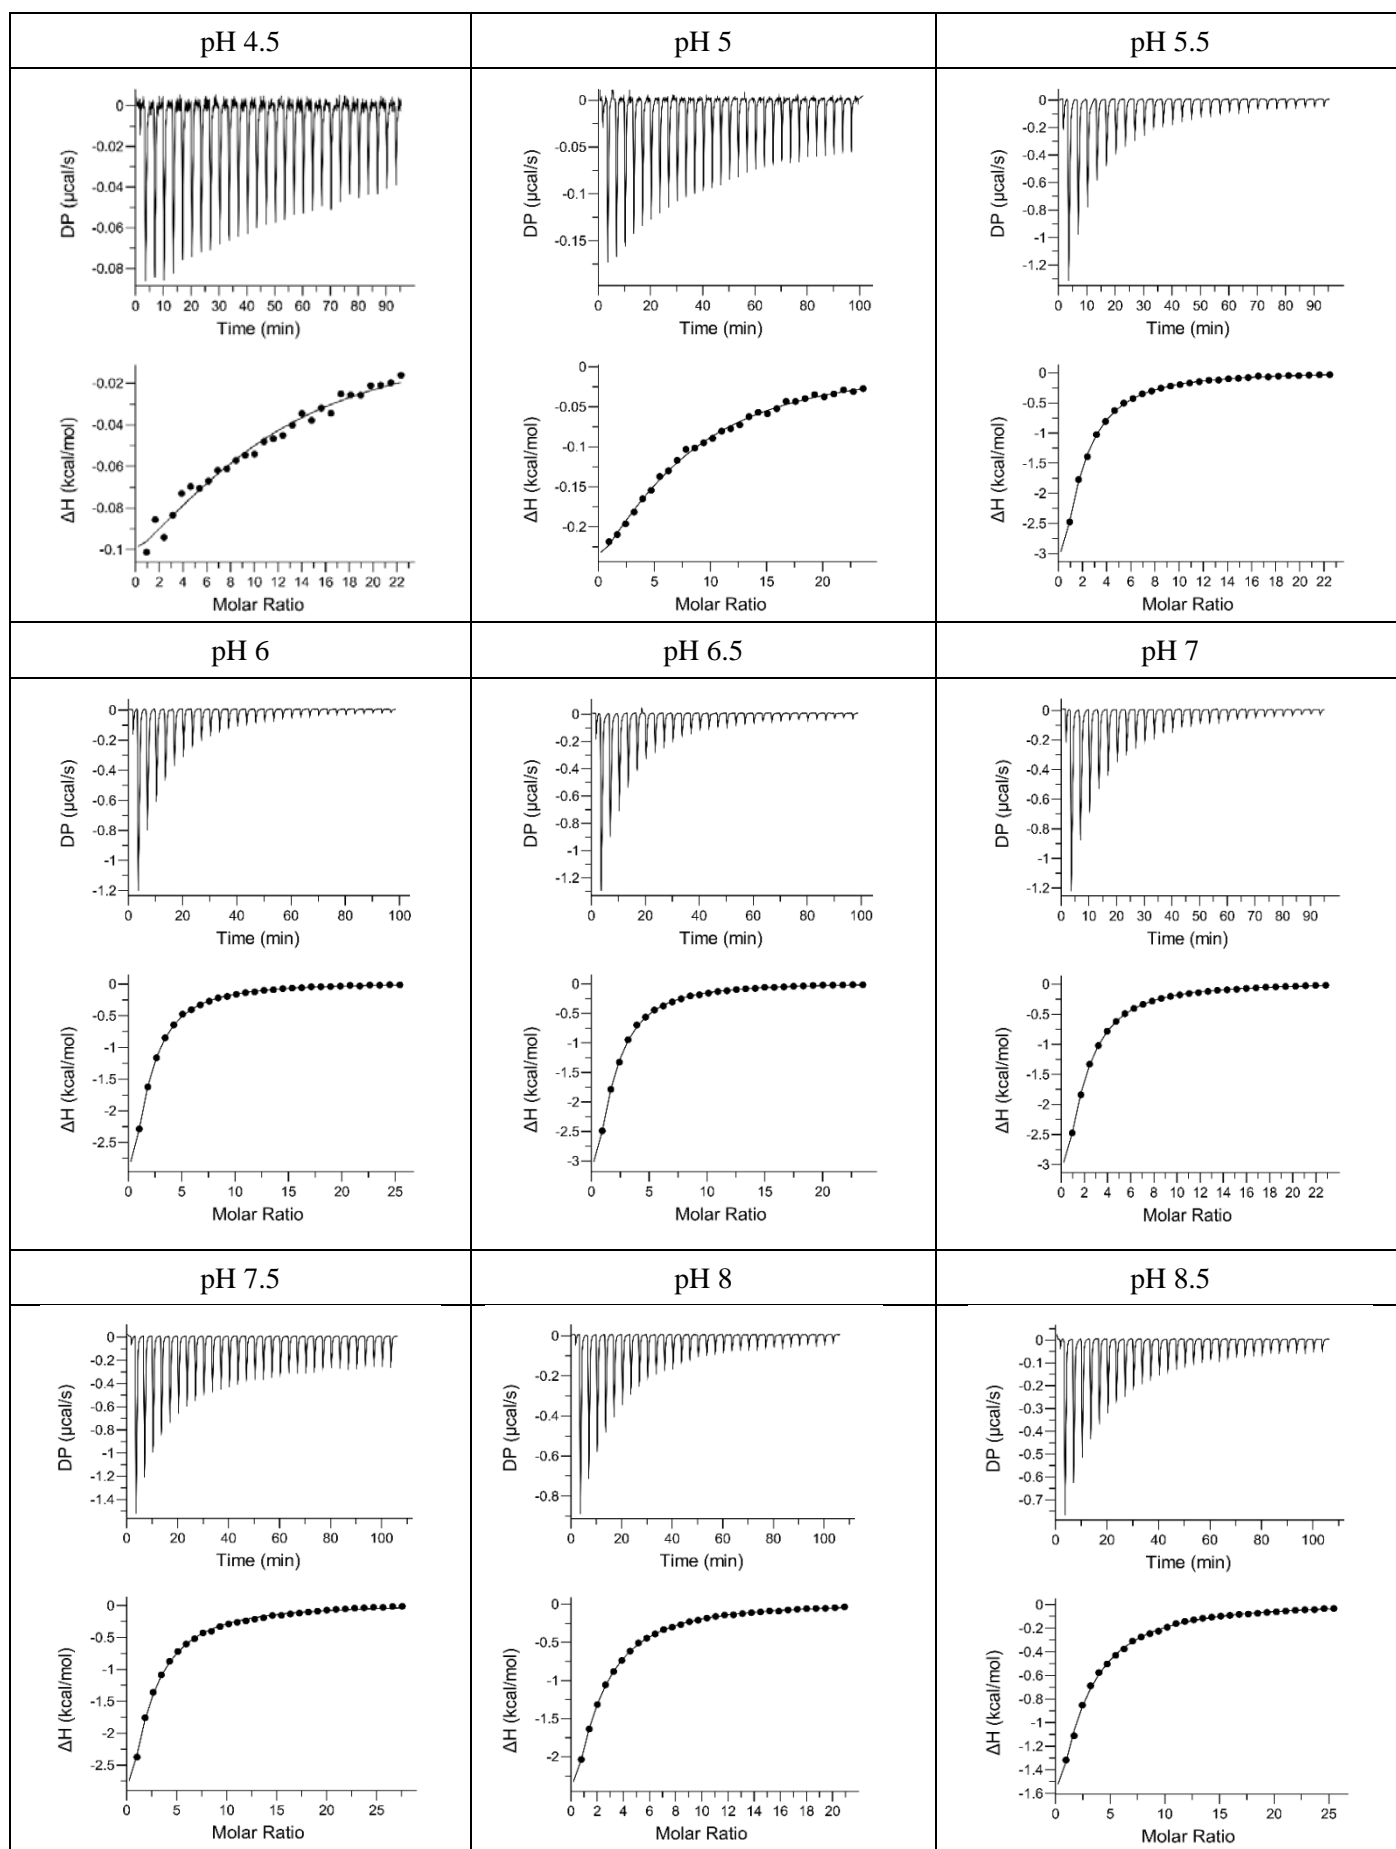

pH 9

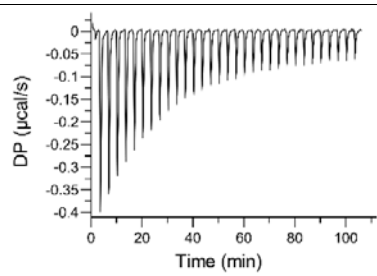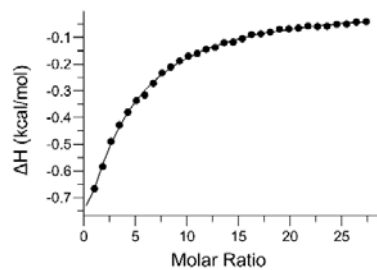

pH 9.5

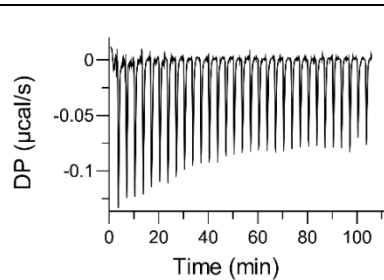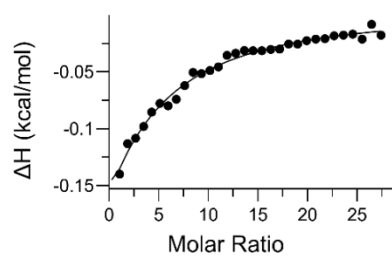

# Propionate recognition by McpV-LBD

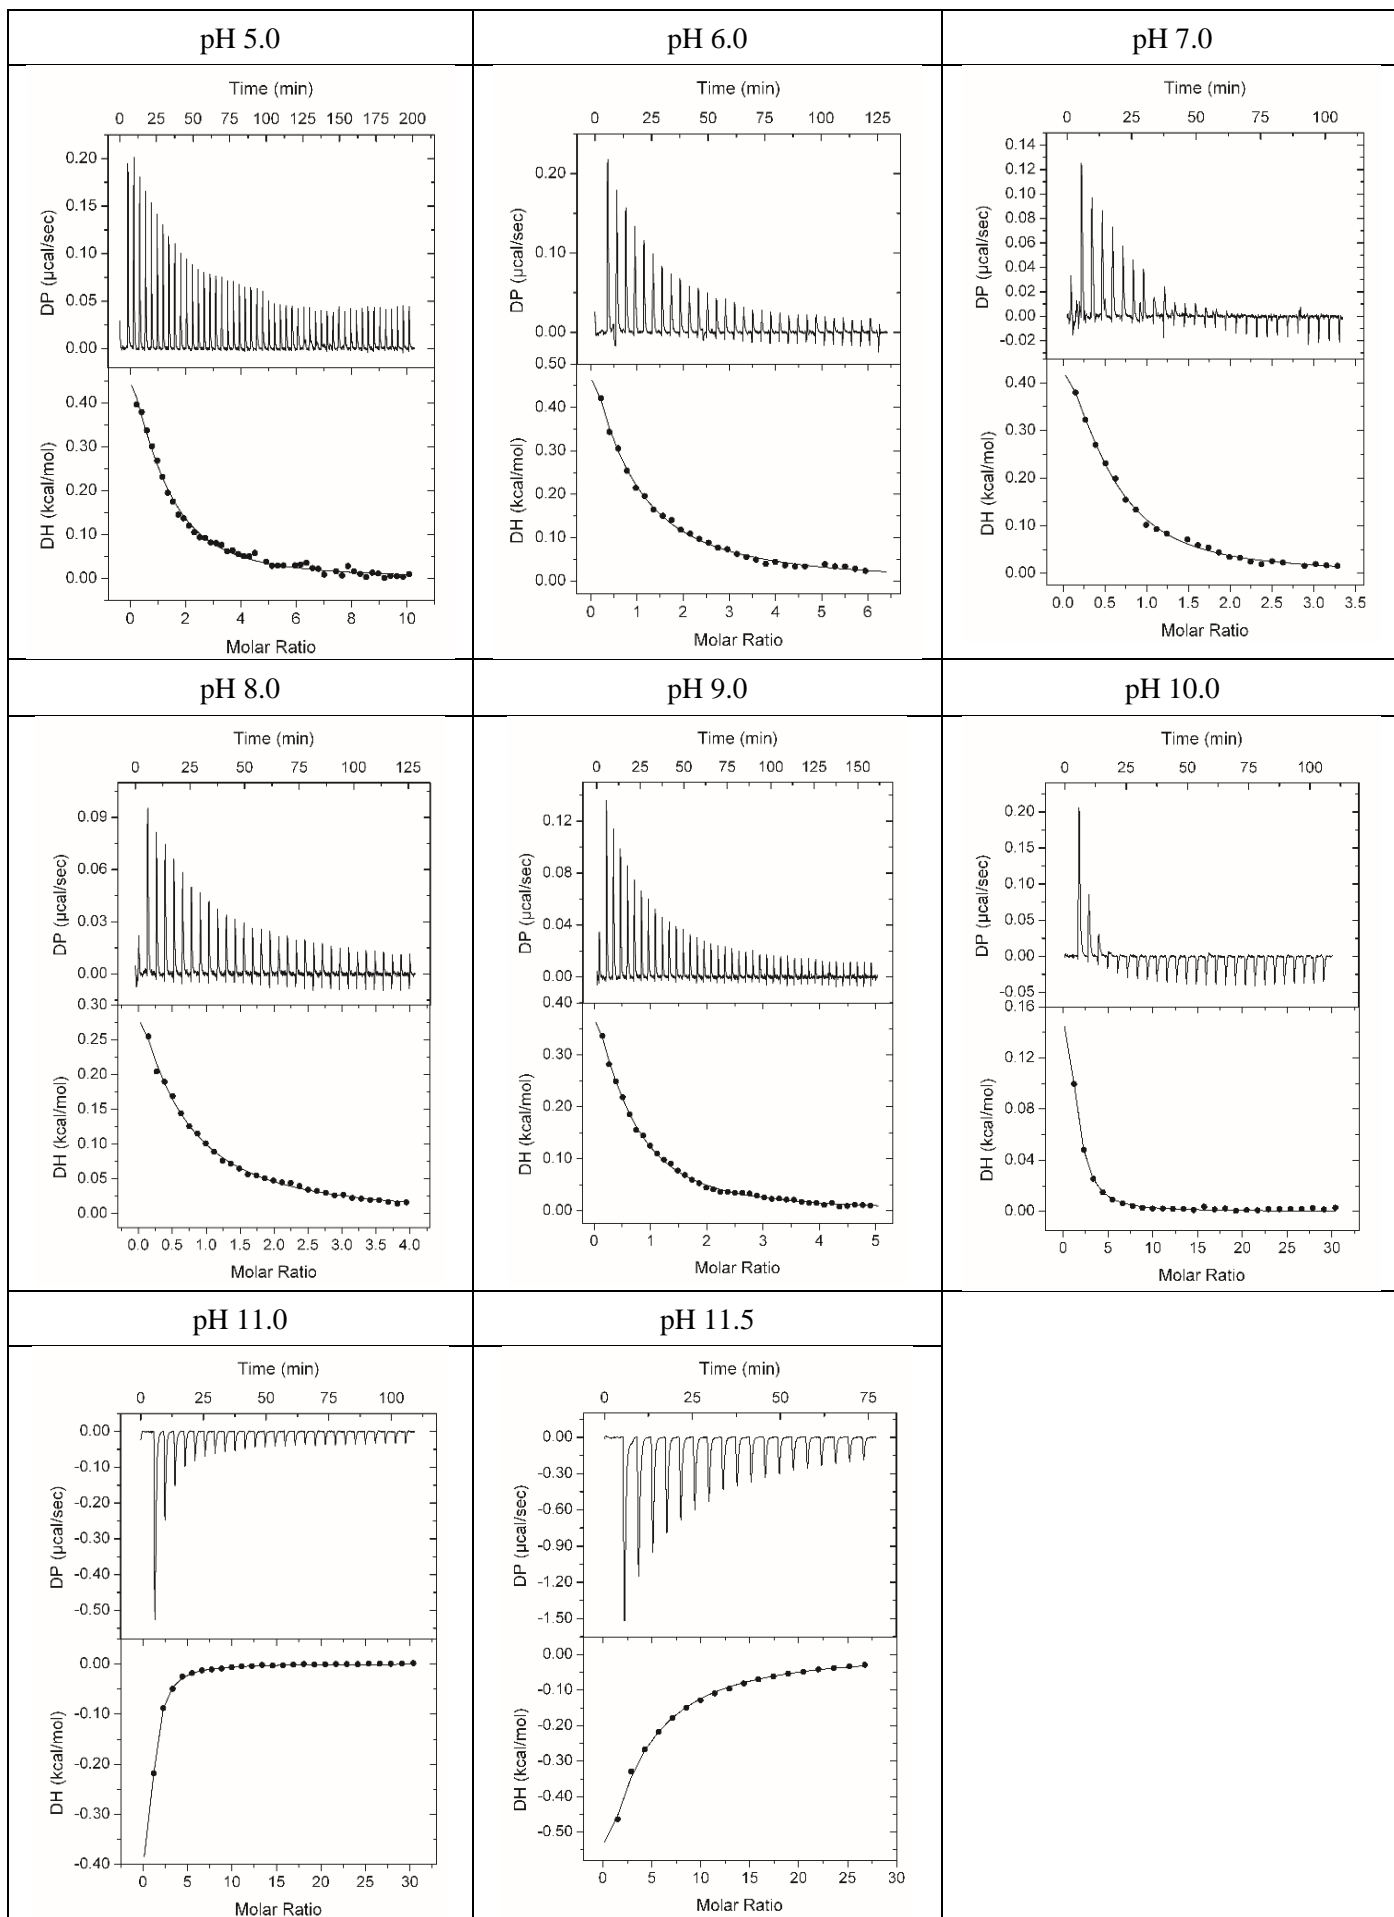

# L-alanine recognition by PctA-LBD

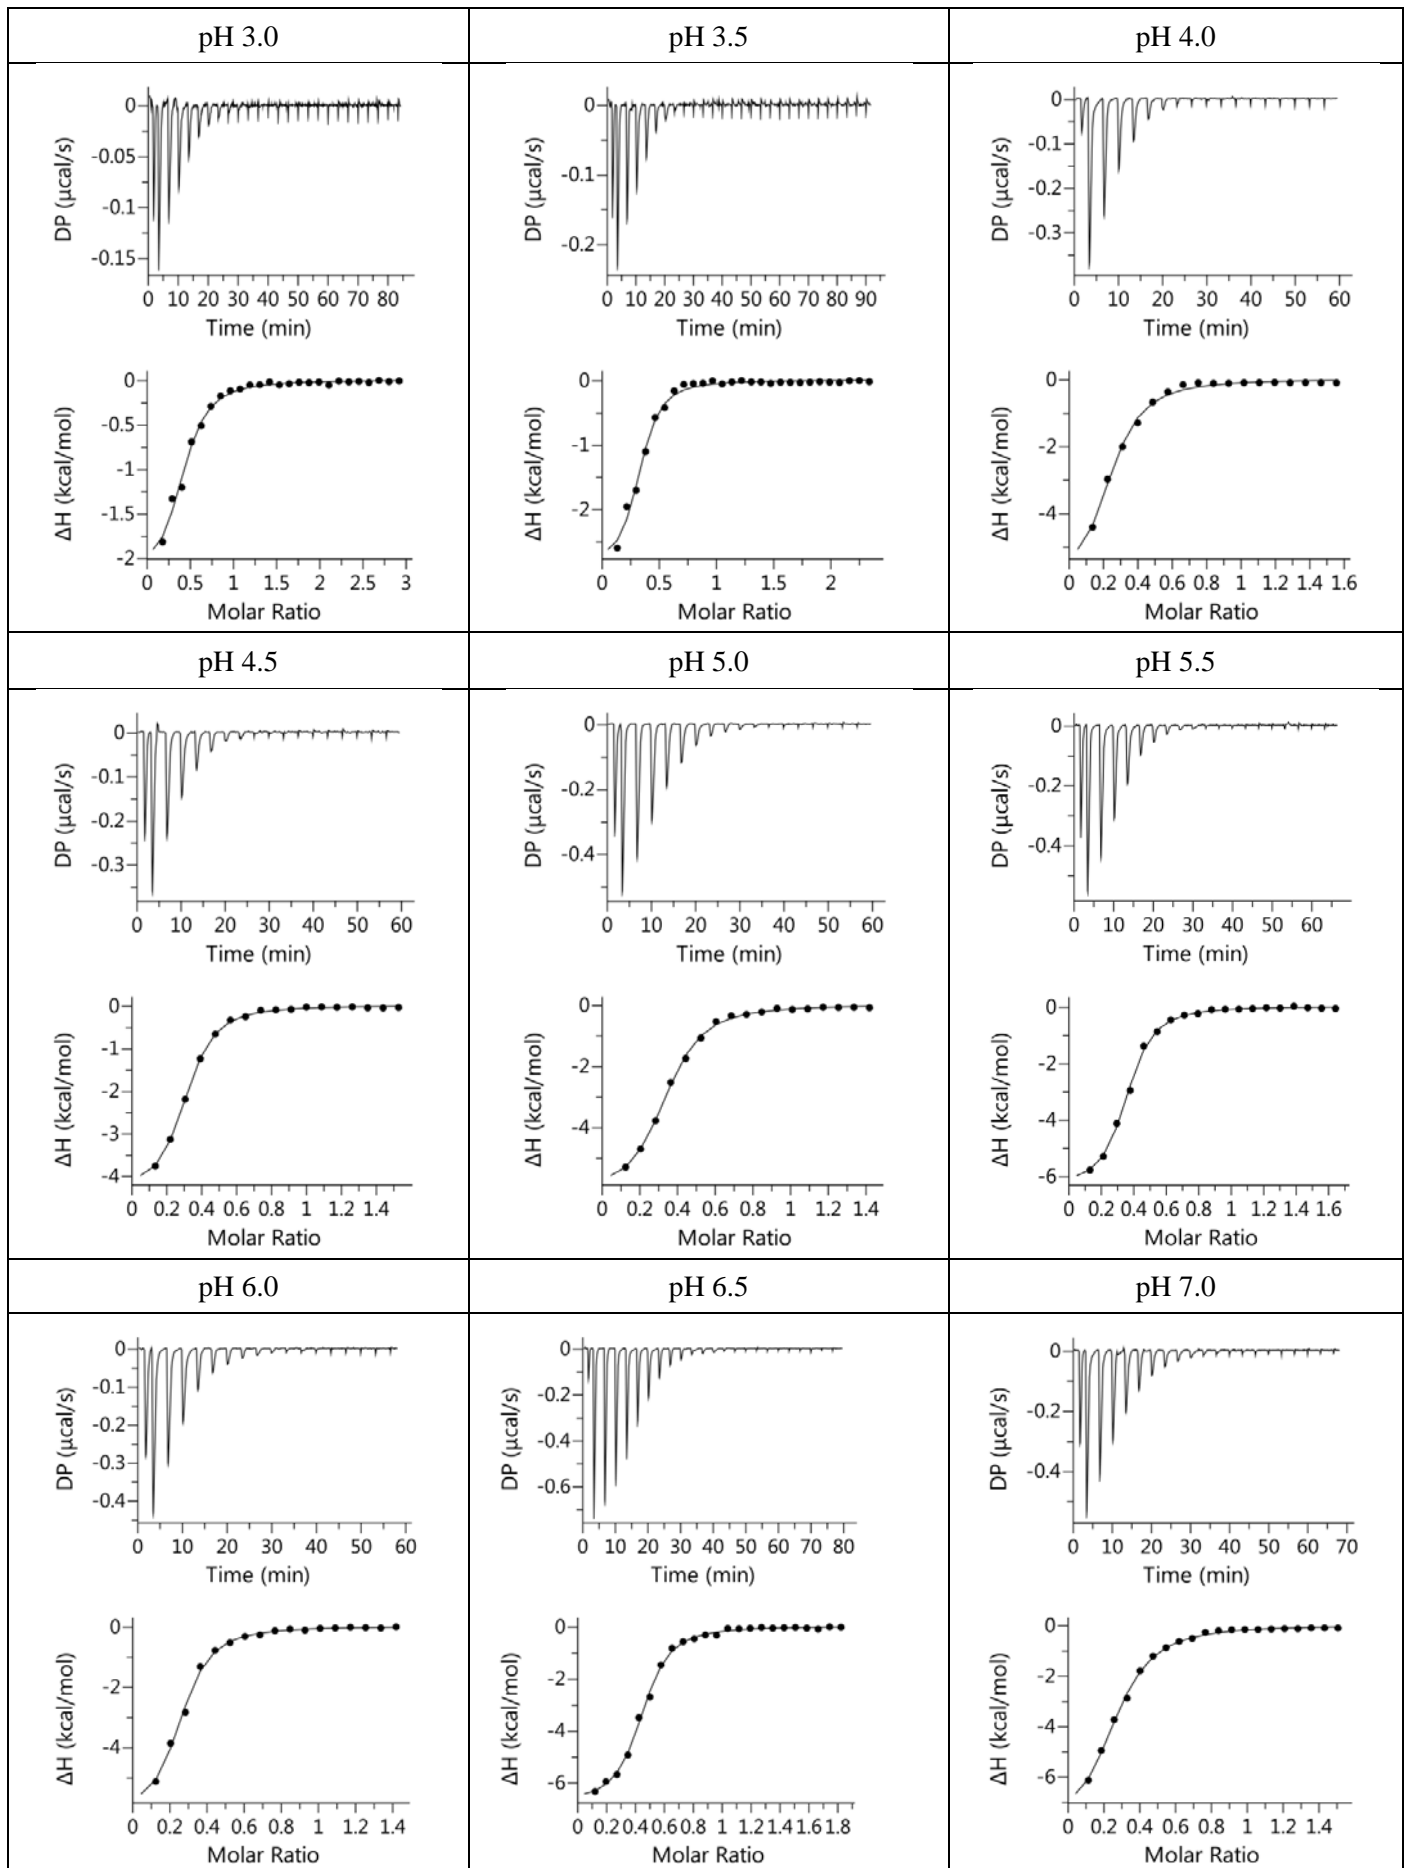

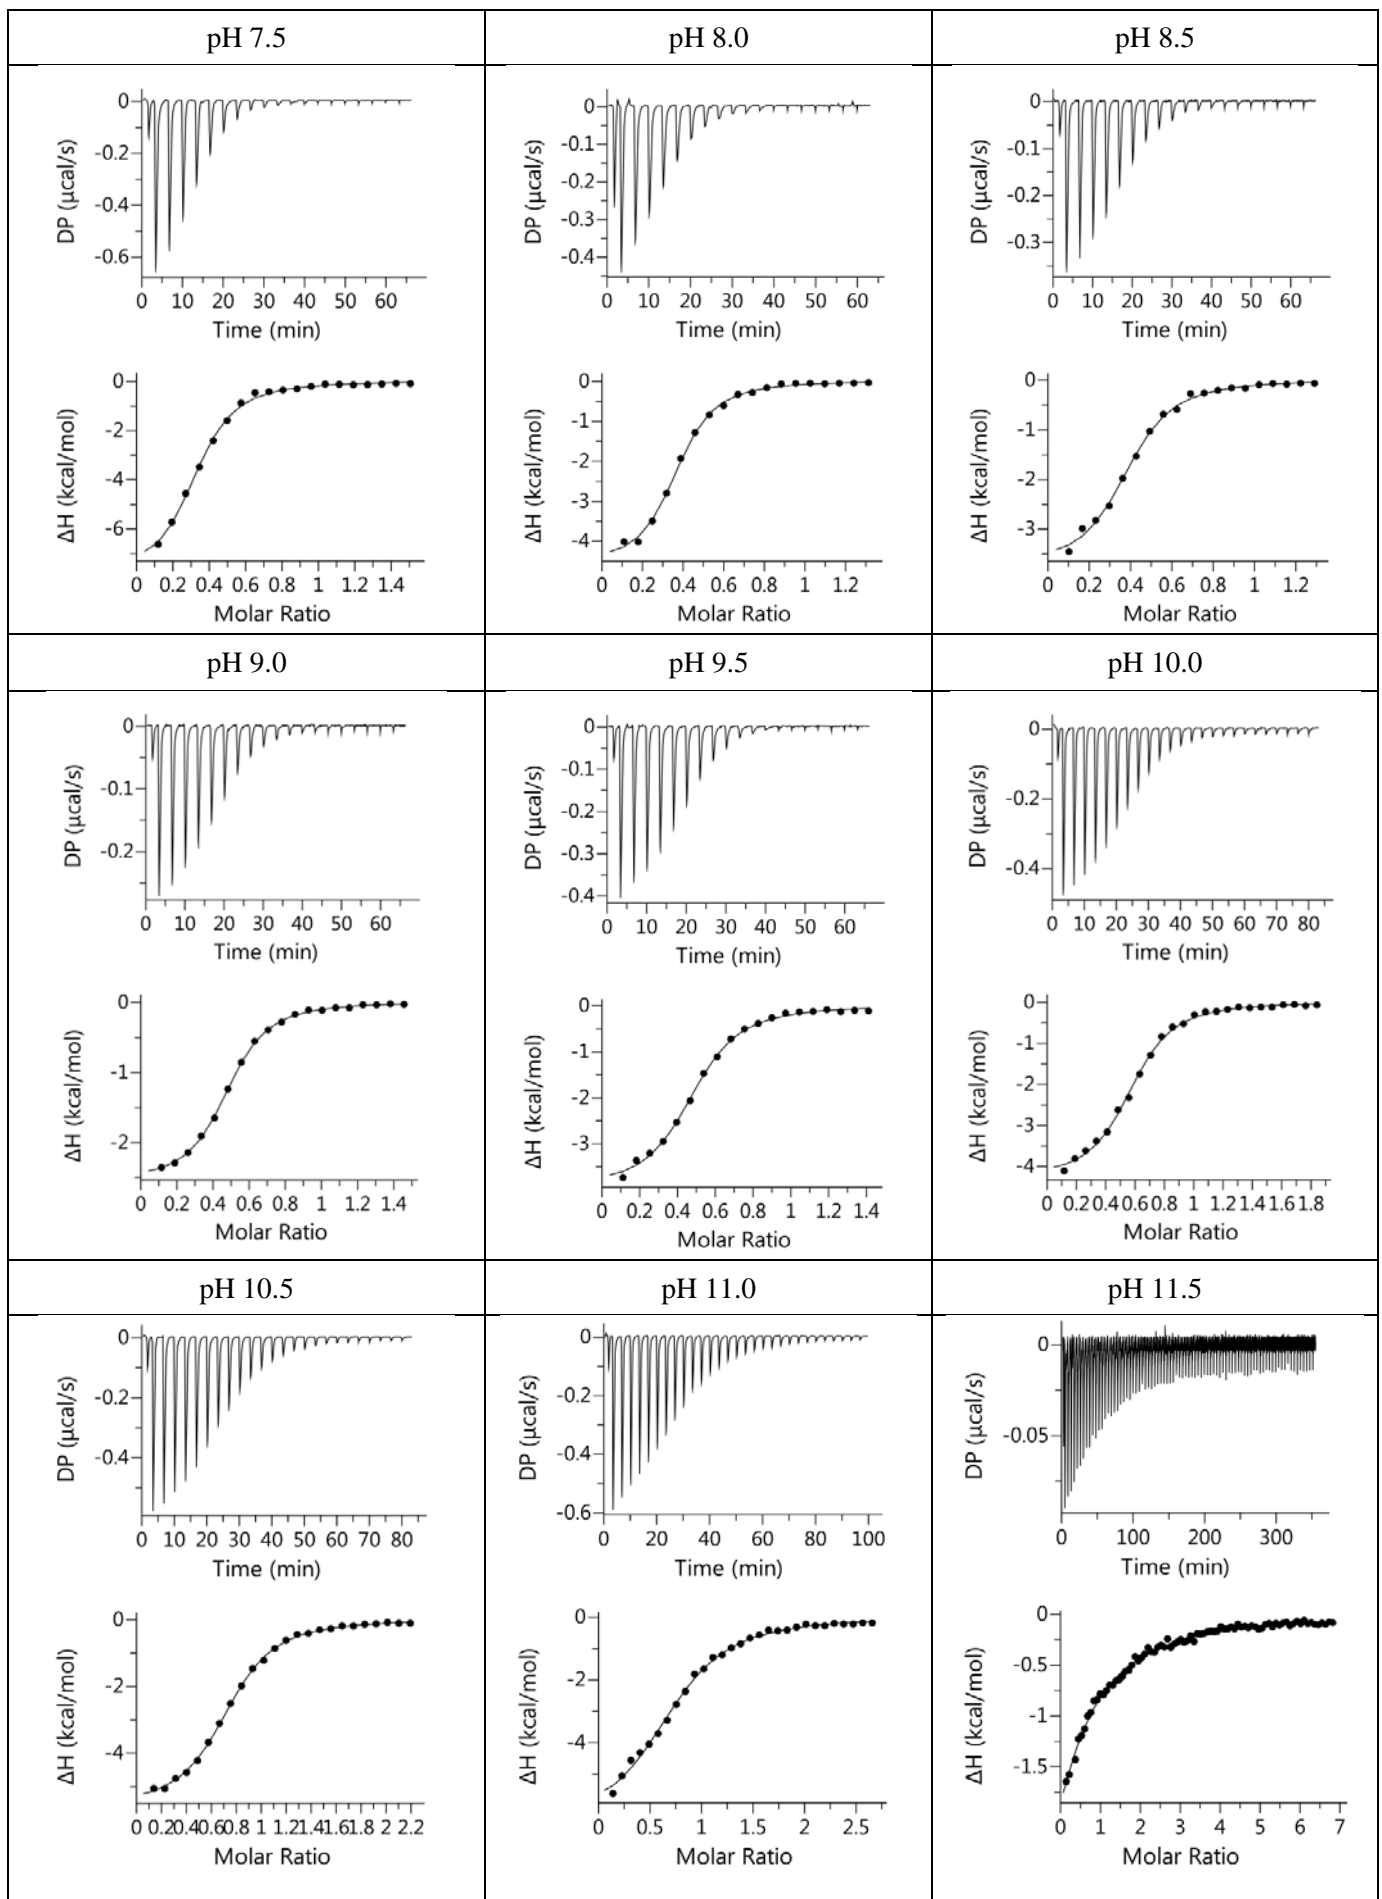

# Adenine recognition by MepH-LBD

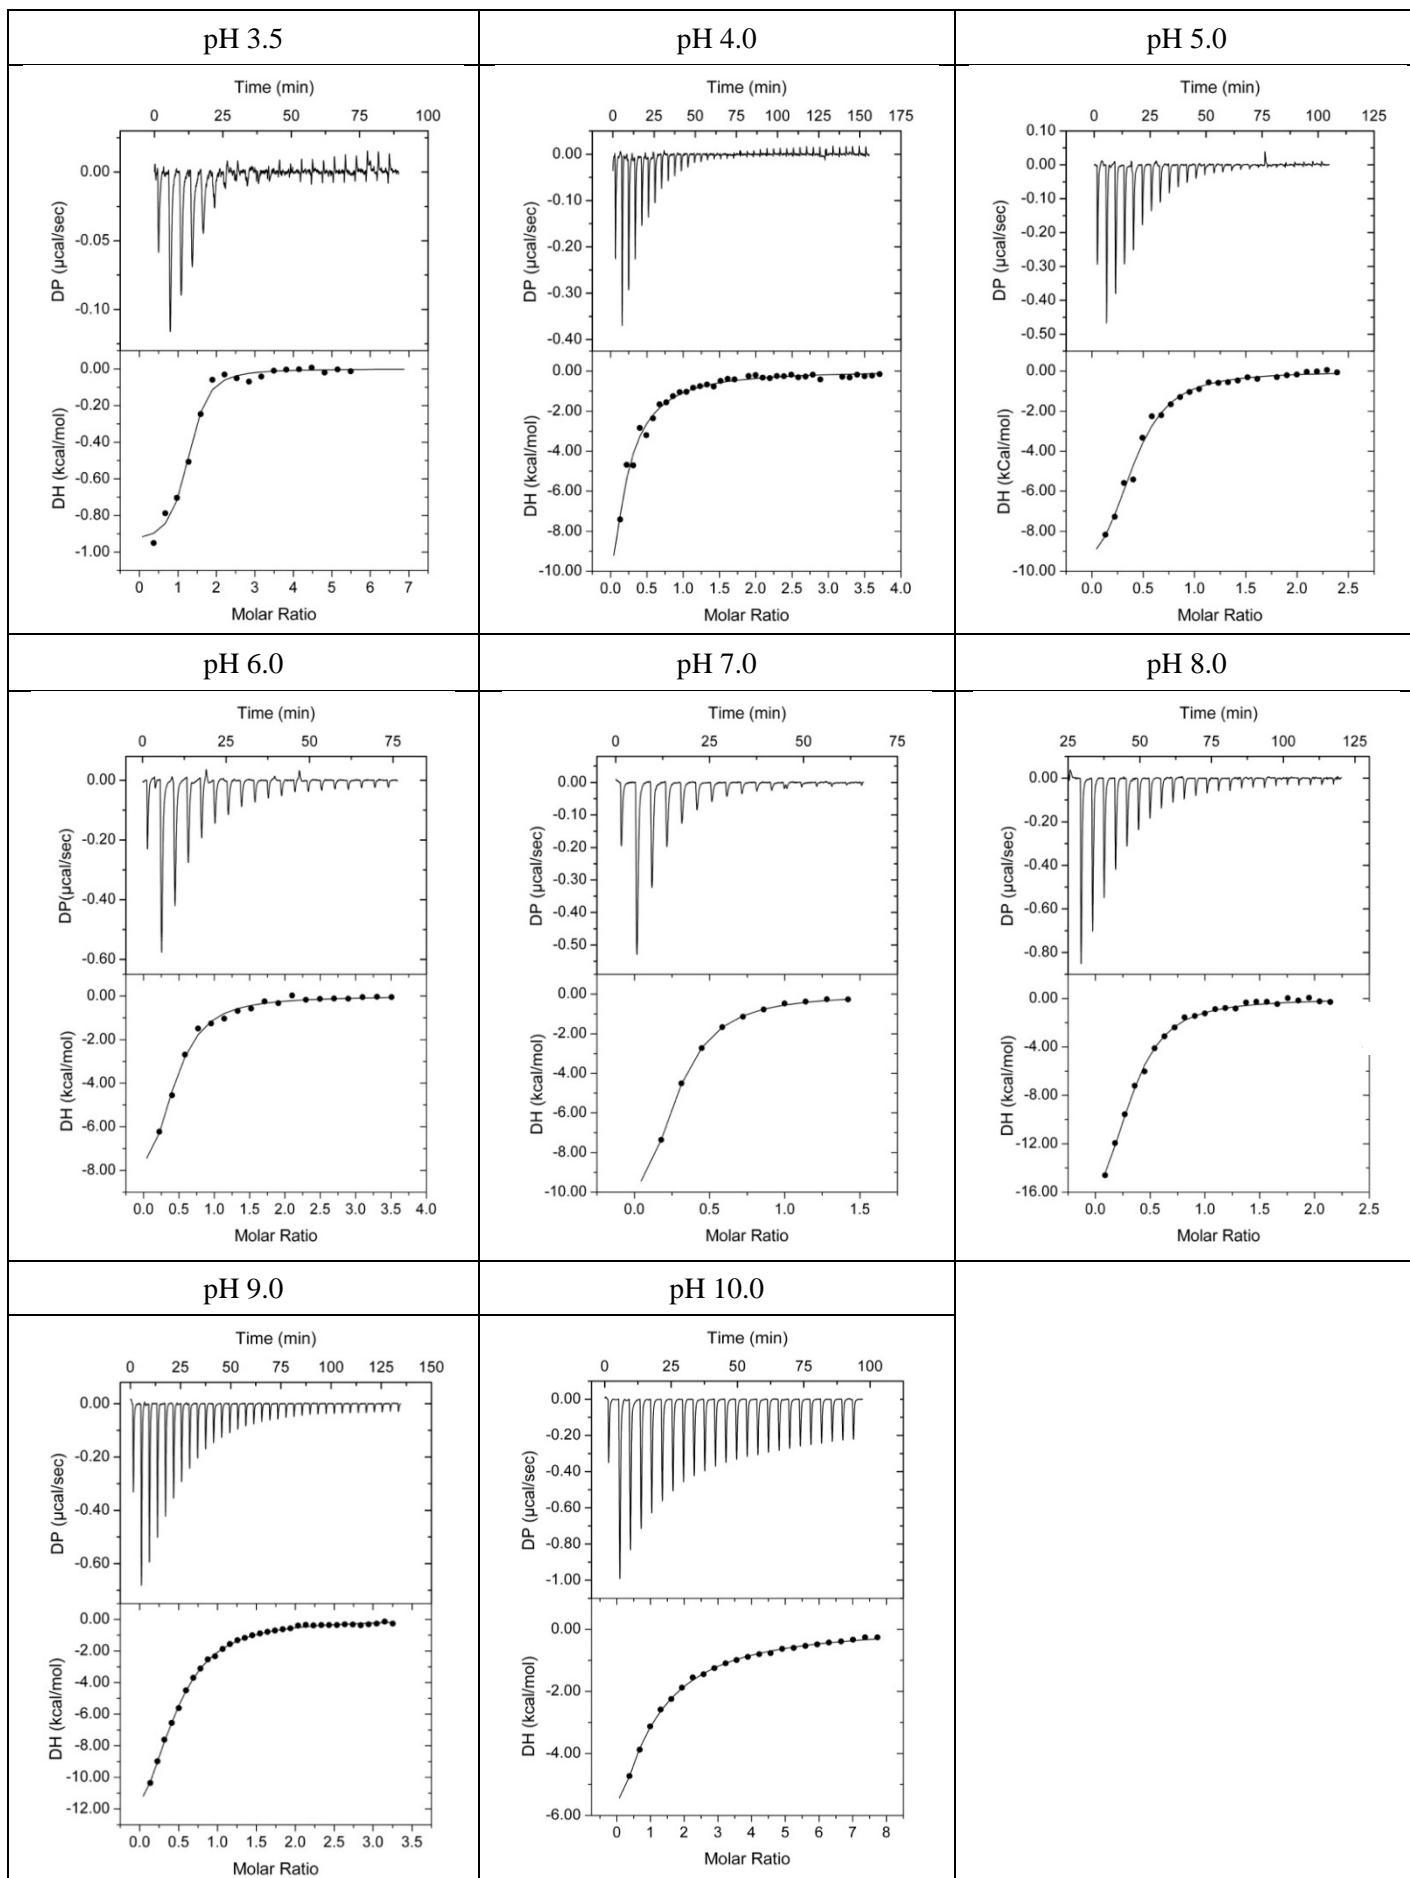

# Putrescine recognition by MepU-LBD

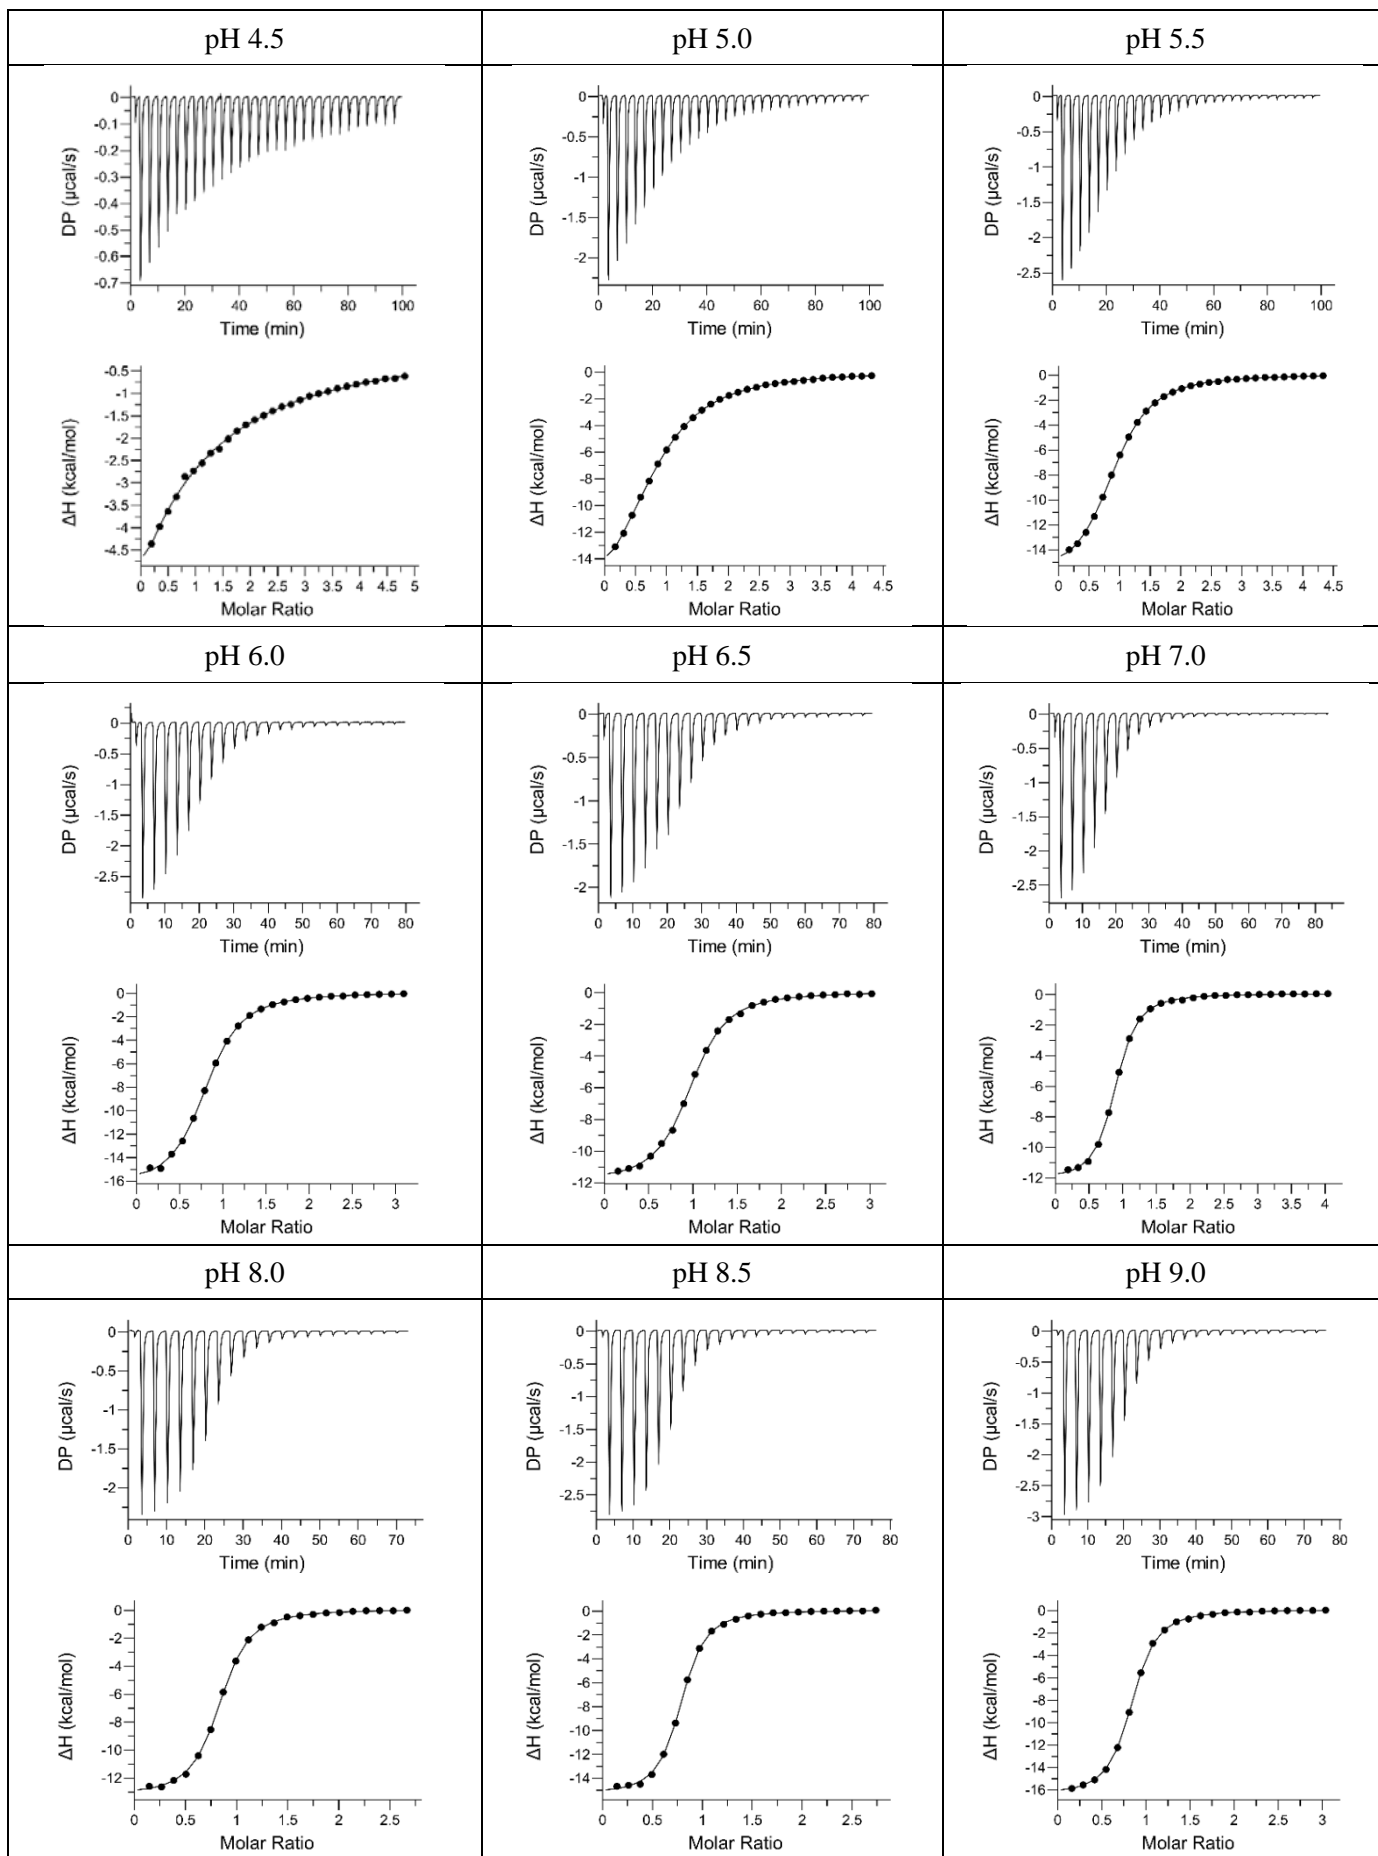

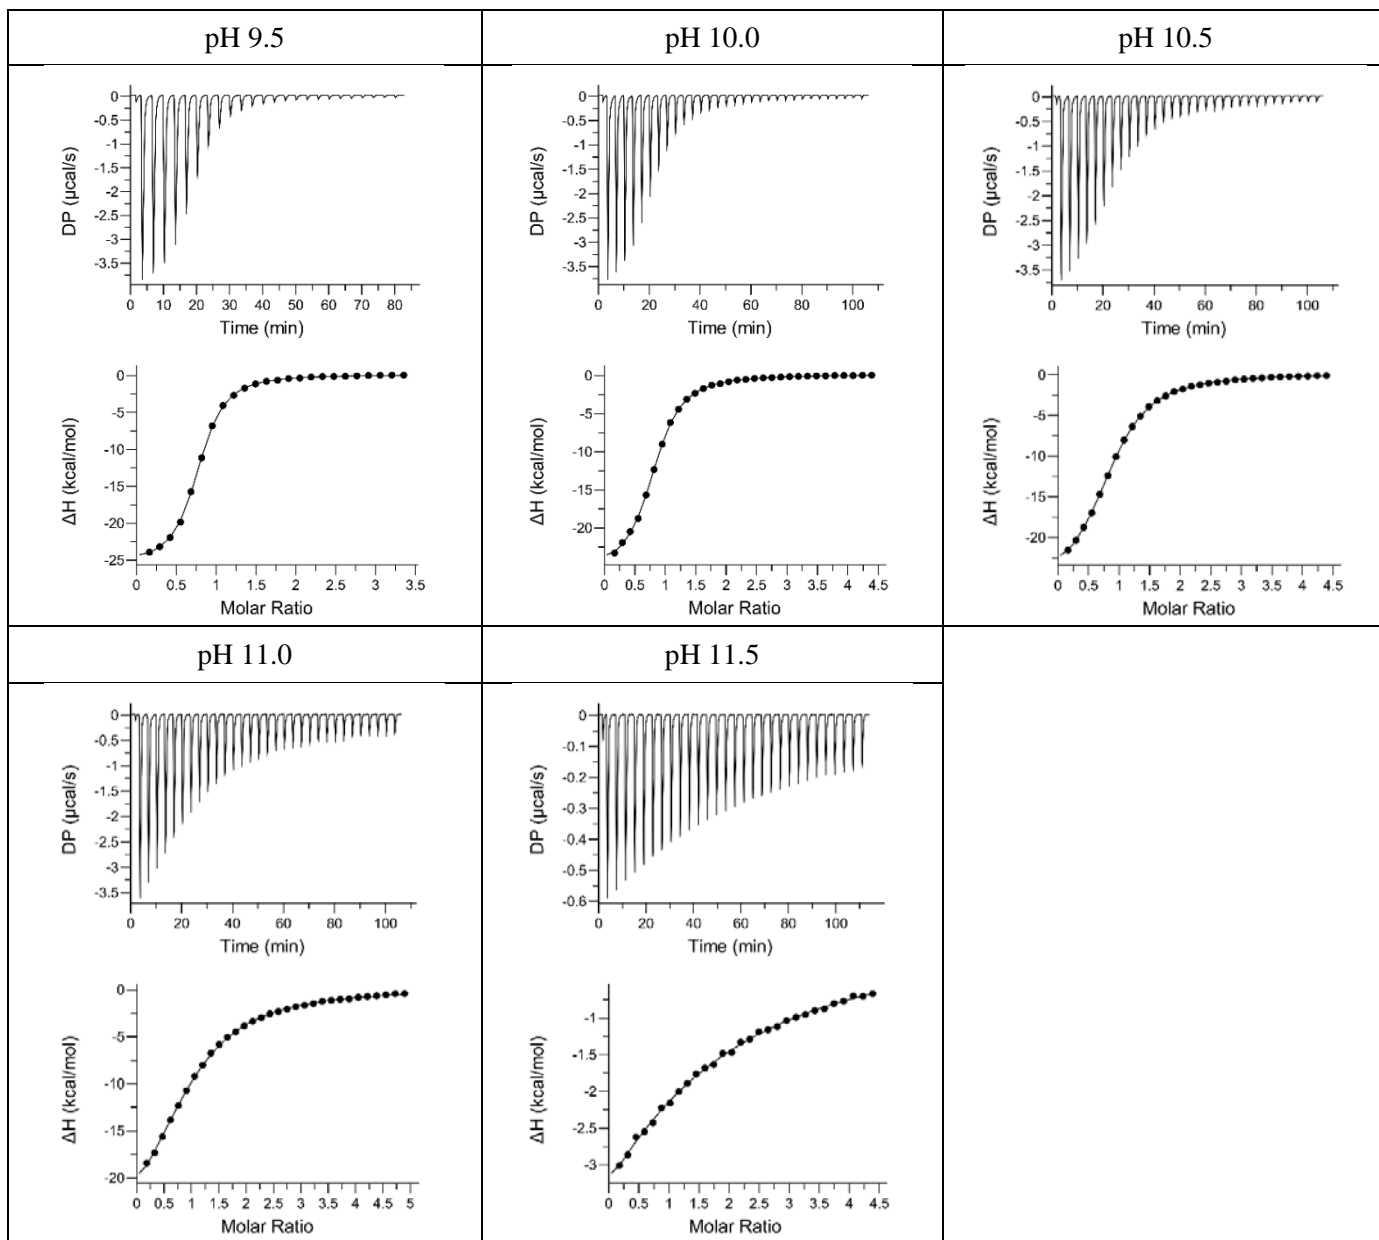

Supplement: mbio.01650-22-s0005.pdf [file mbio.01650-22-s0005.pdf]
