# Supplementary material for: The pH Robustness of Bacterial Sensing
Source: PubMed Central journal article supplement (PMC9600550; doi:10.1128/mbio.01650-22), 2022-09-26

**Fig S2. Microcalorimetric titrations of mono- and bimodular four-helix bundle fold ligand binding domains with different ligands at different pH.**

**L-aspartate recognition by Tar-LBD**

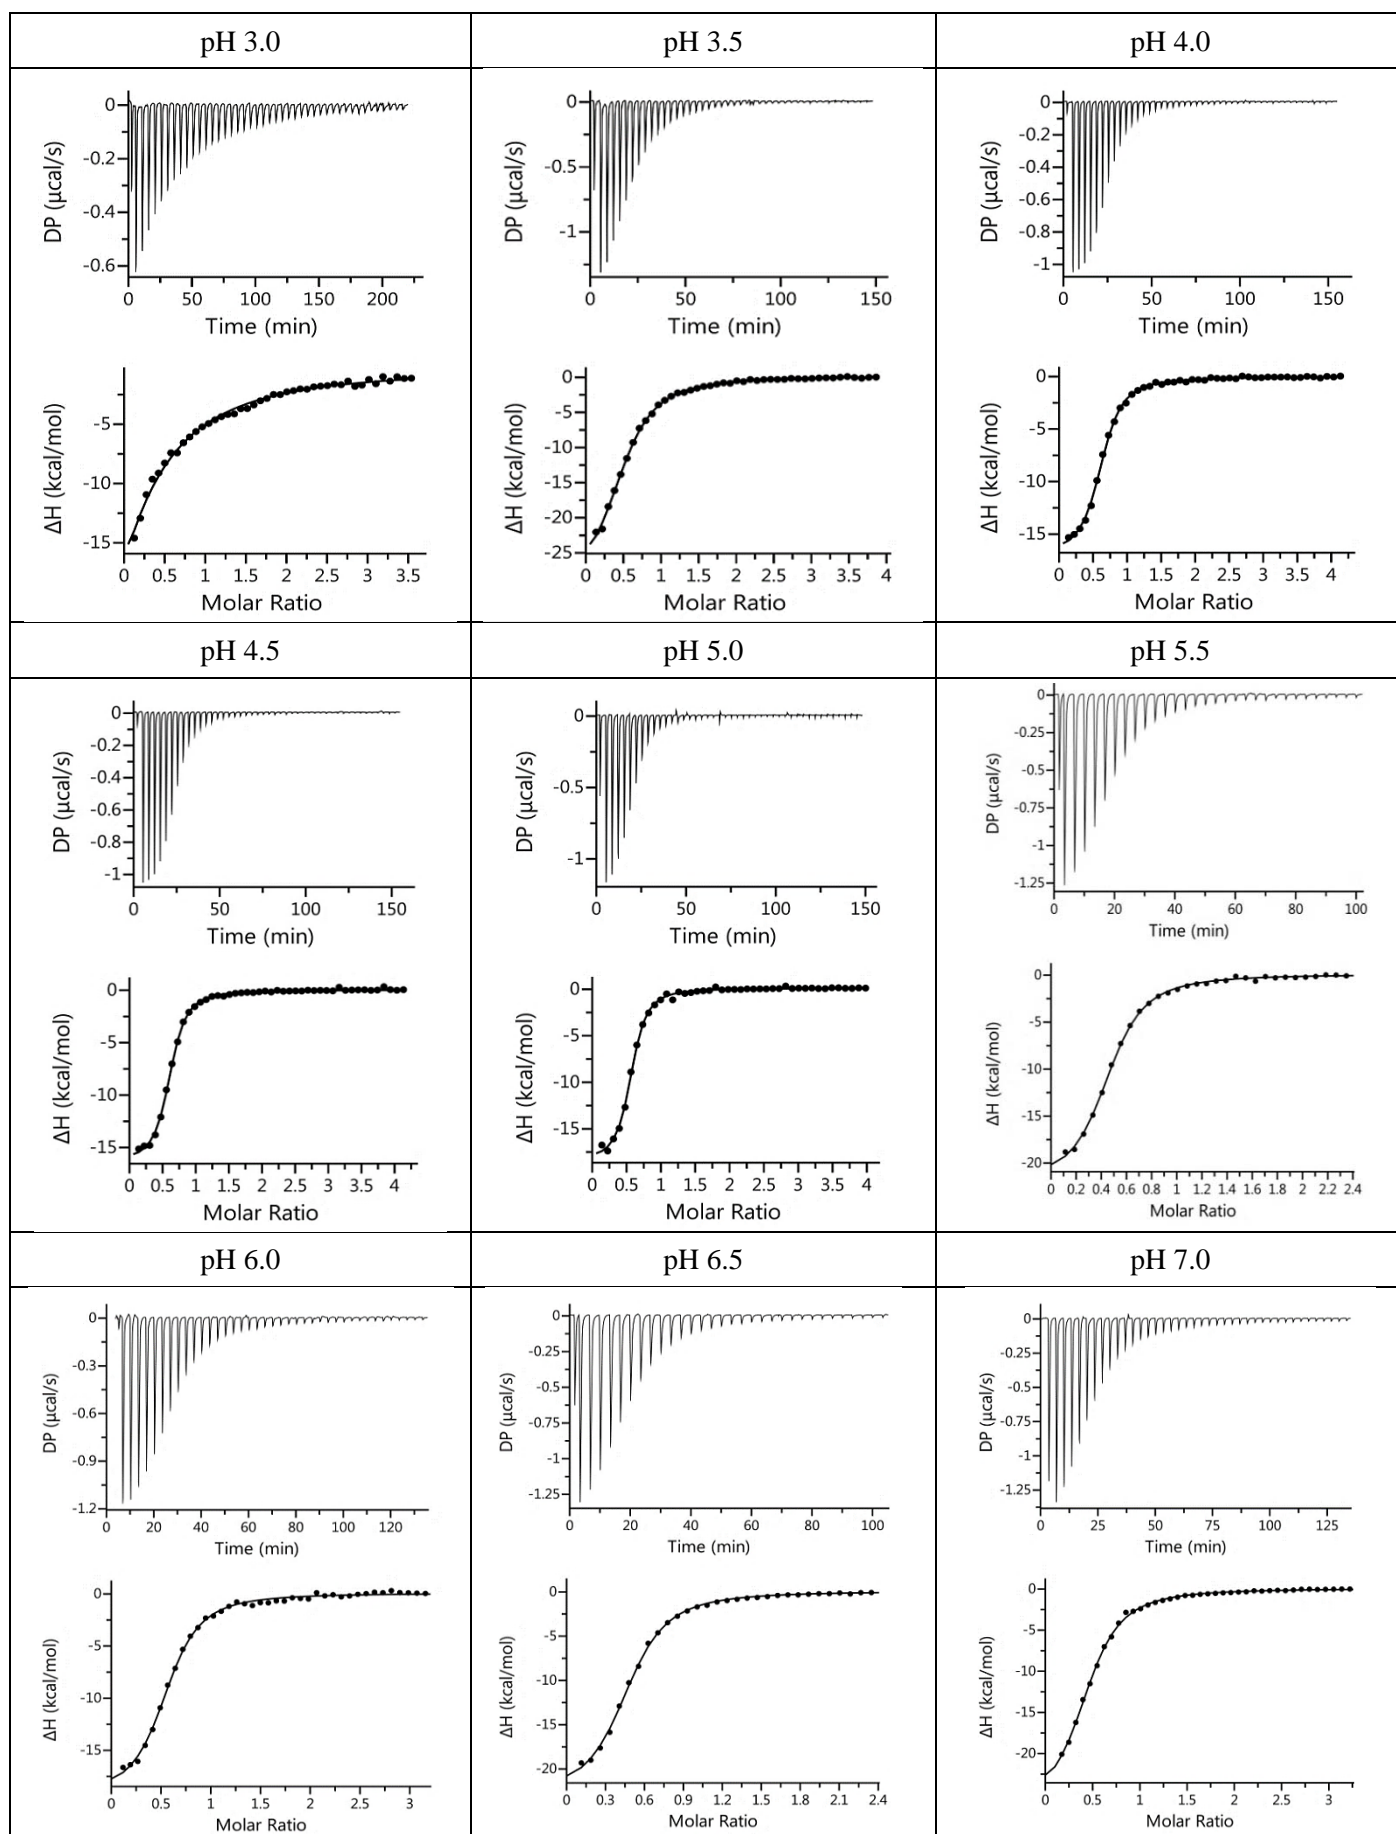

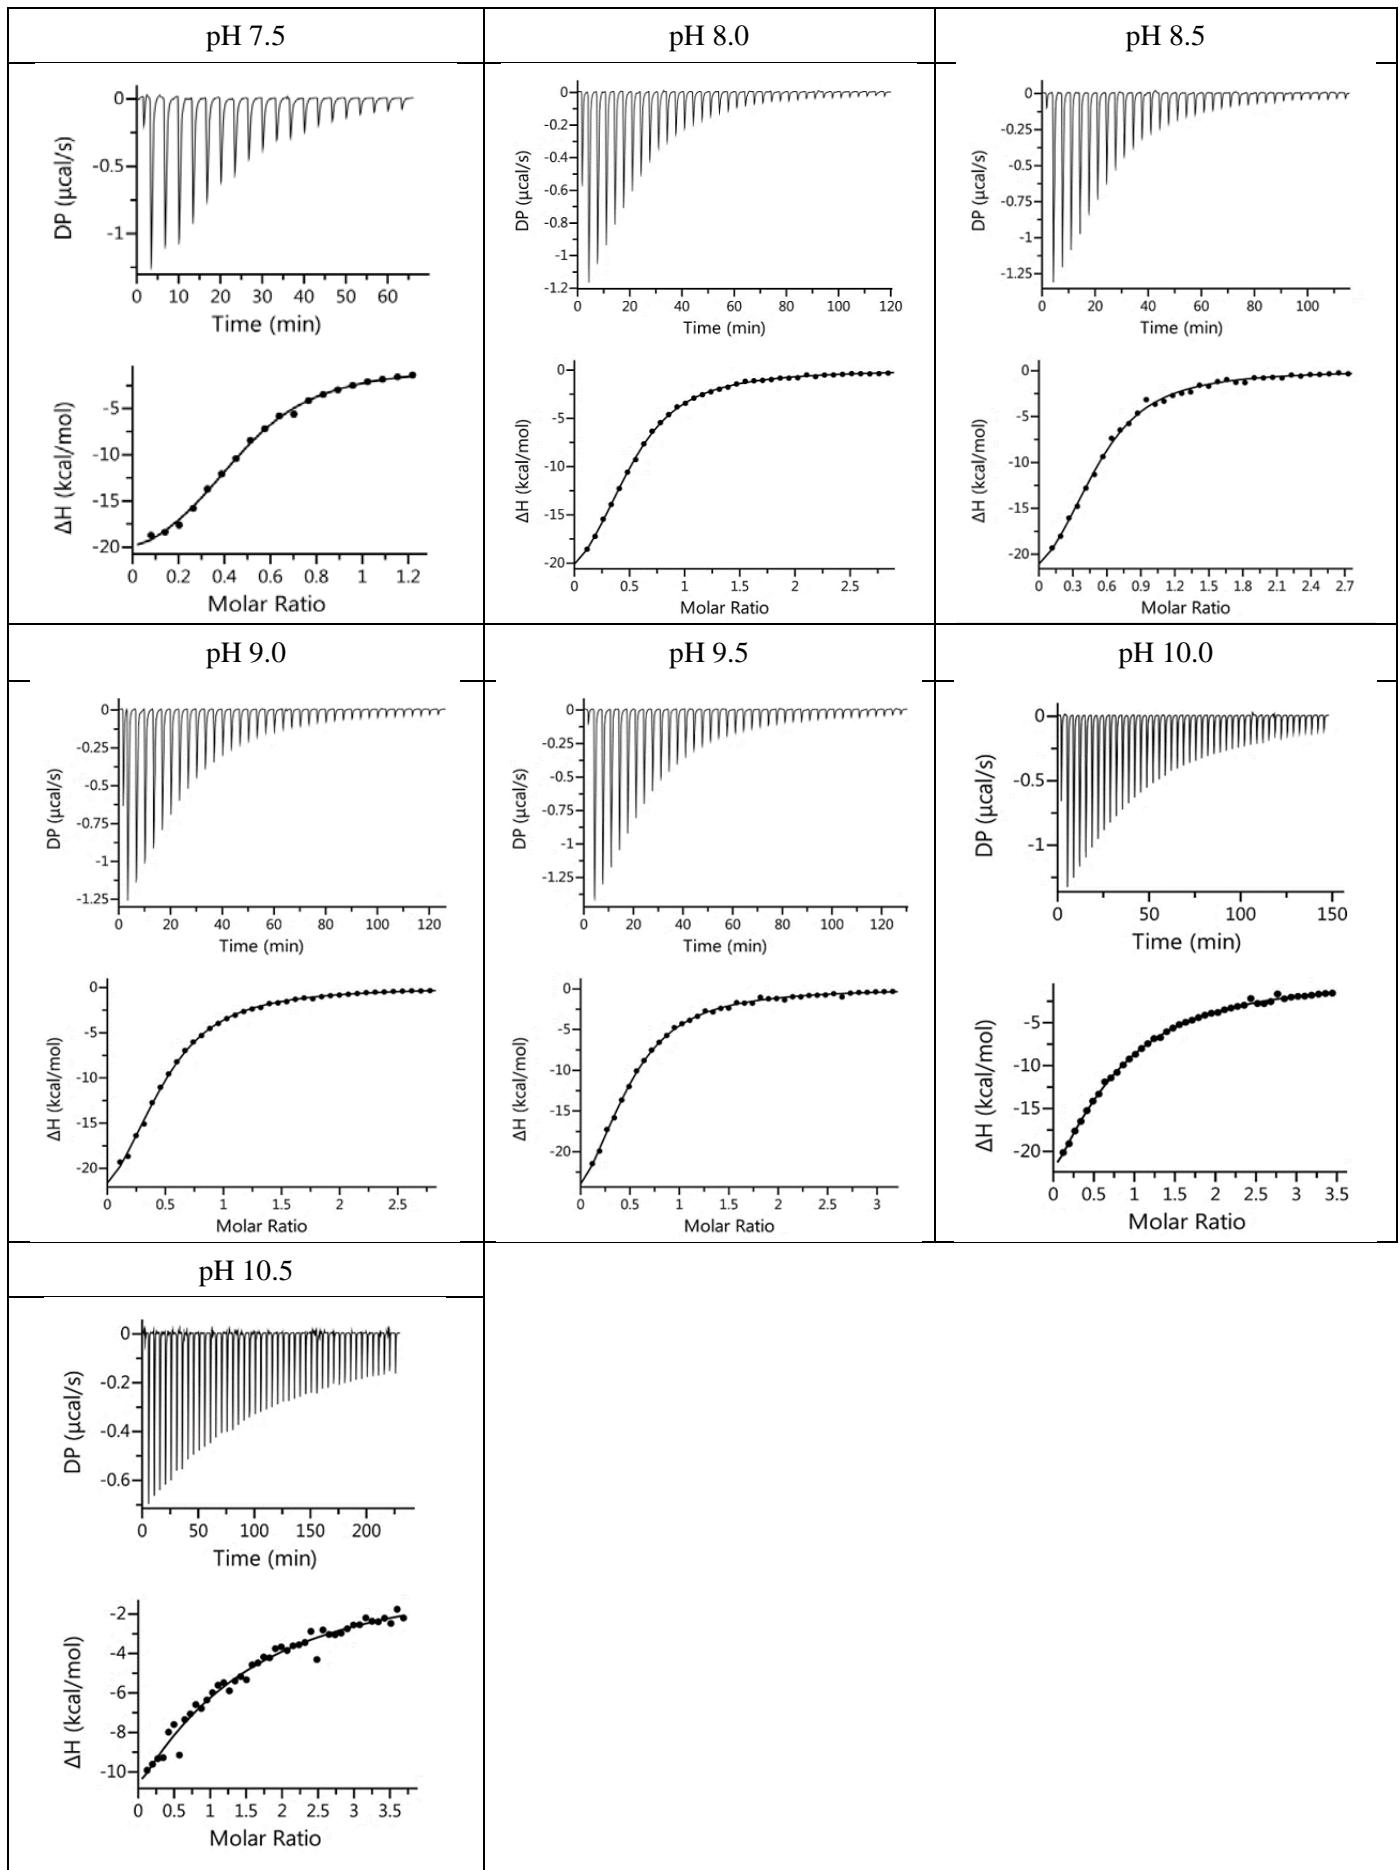

# Quinate recognition by PcaY\_PP-LBD

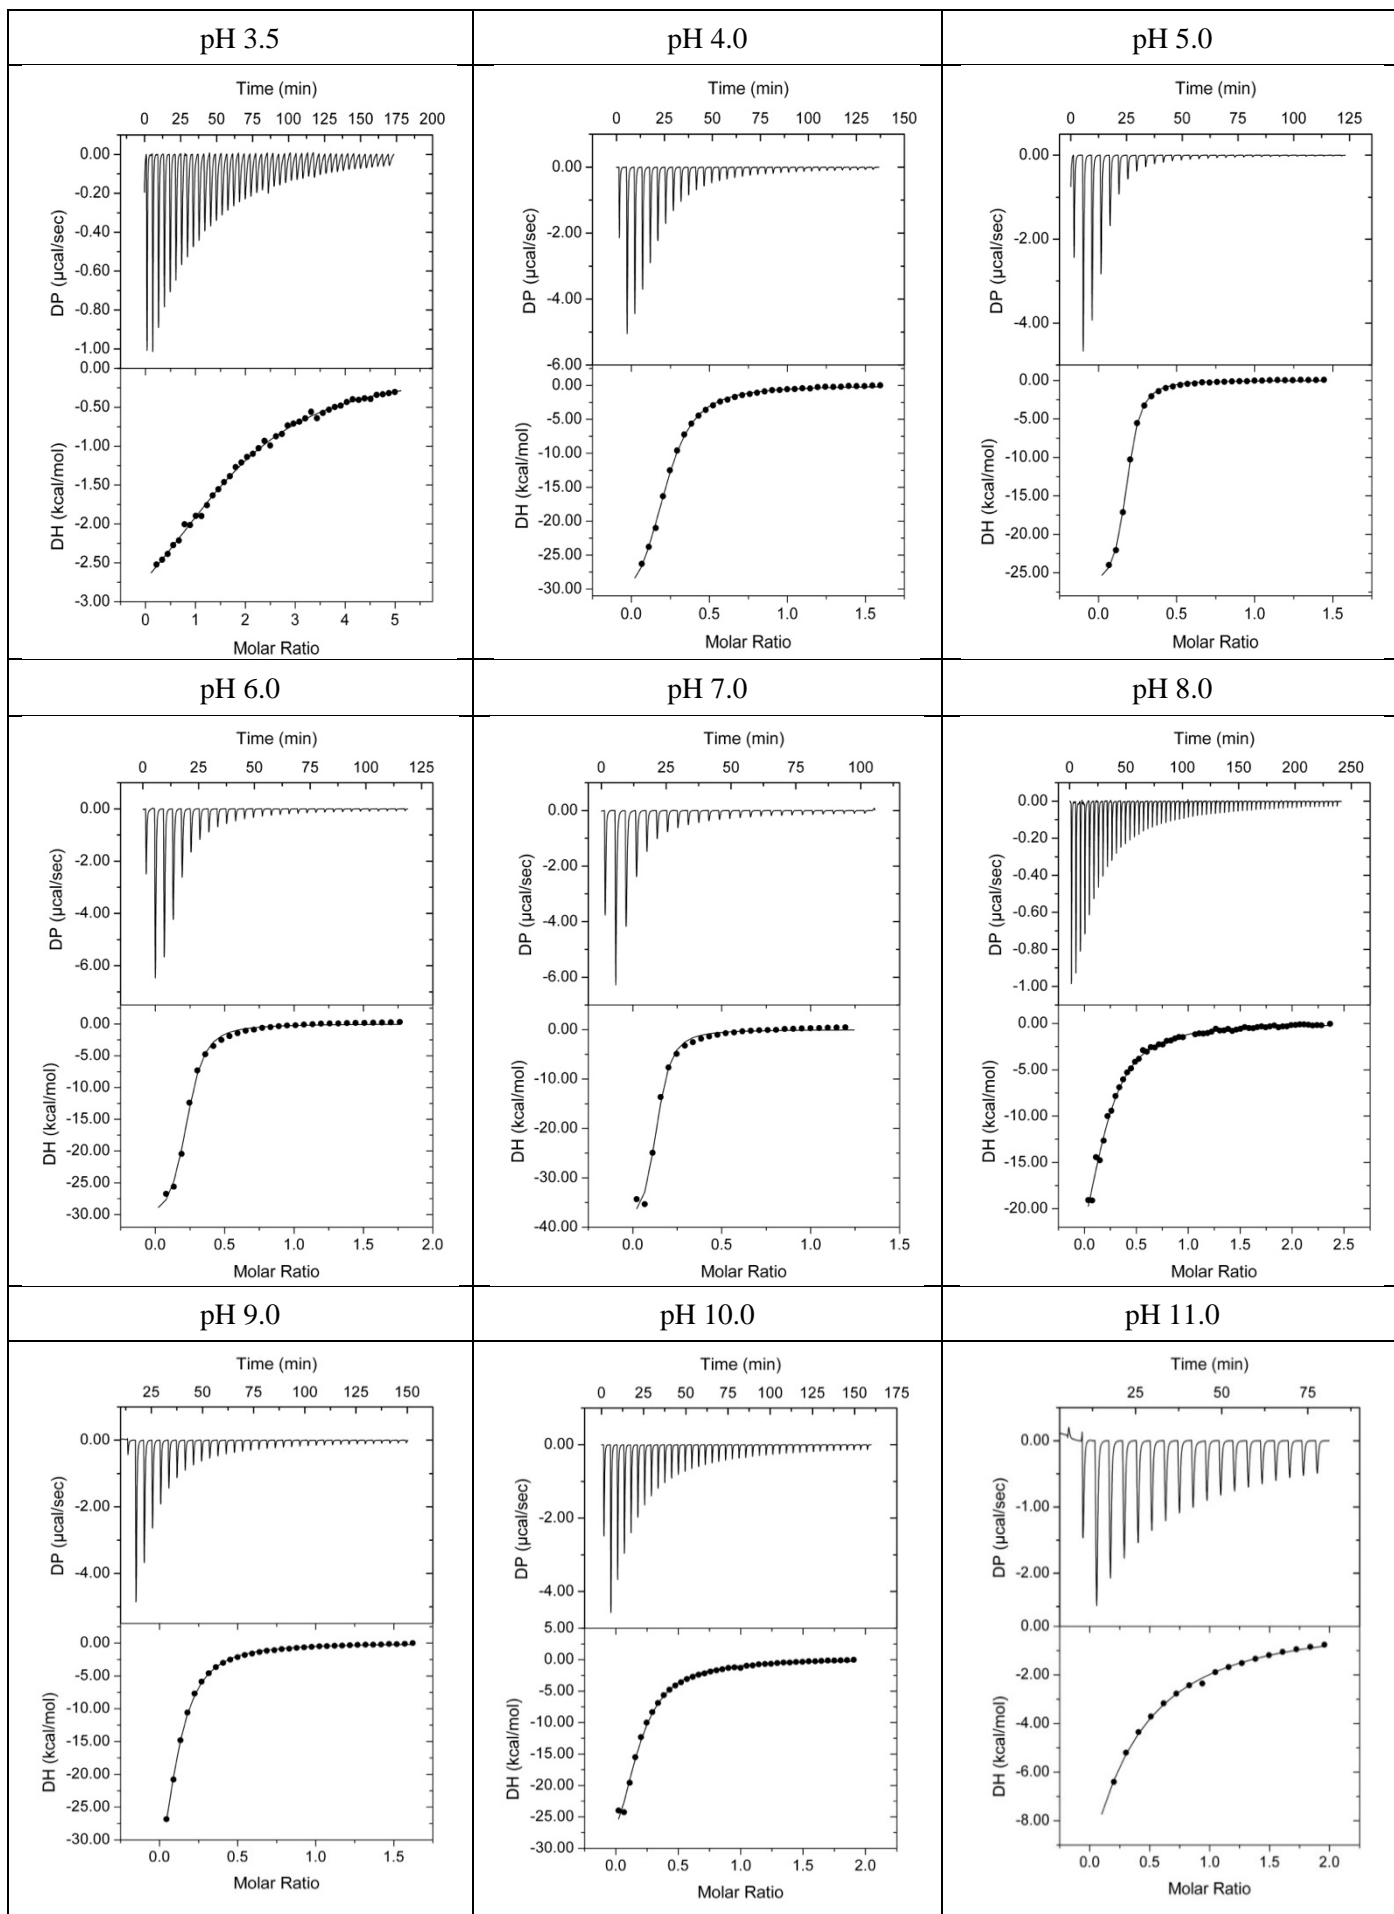

pH 11.5

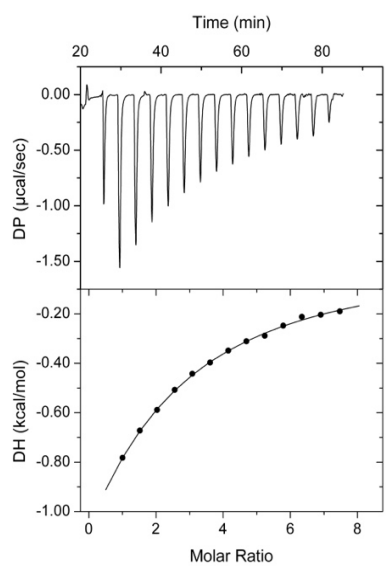

# L-malate recognition by McpS-LBD

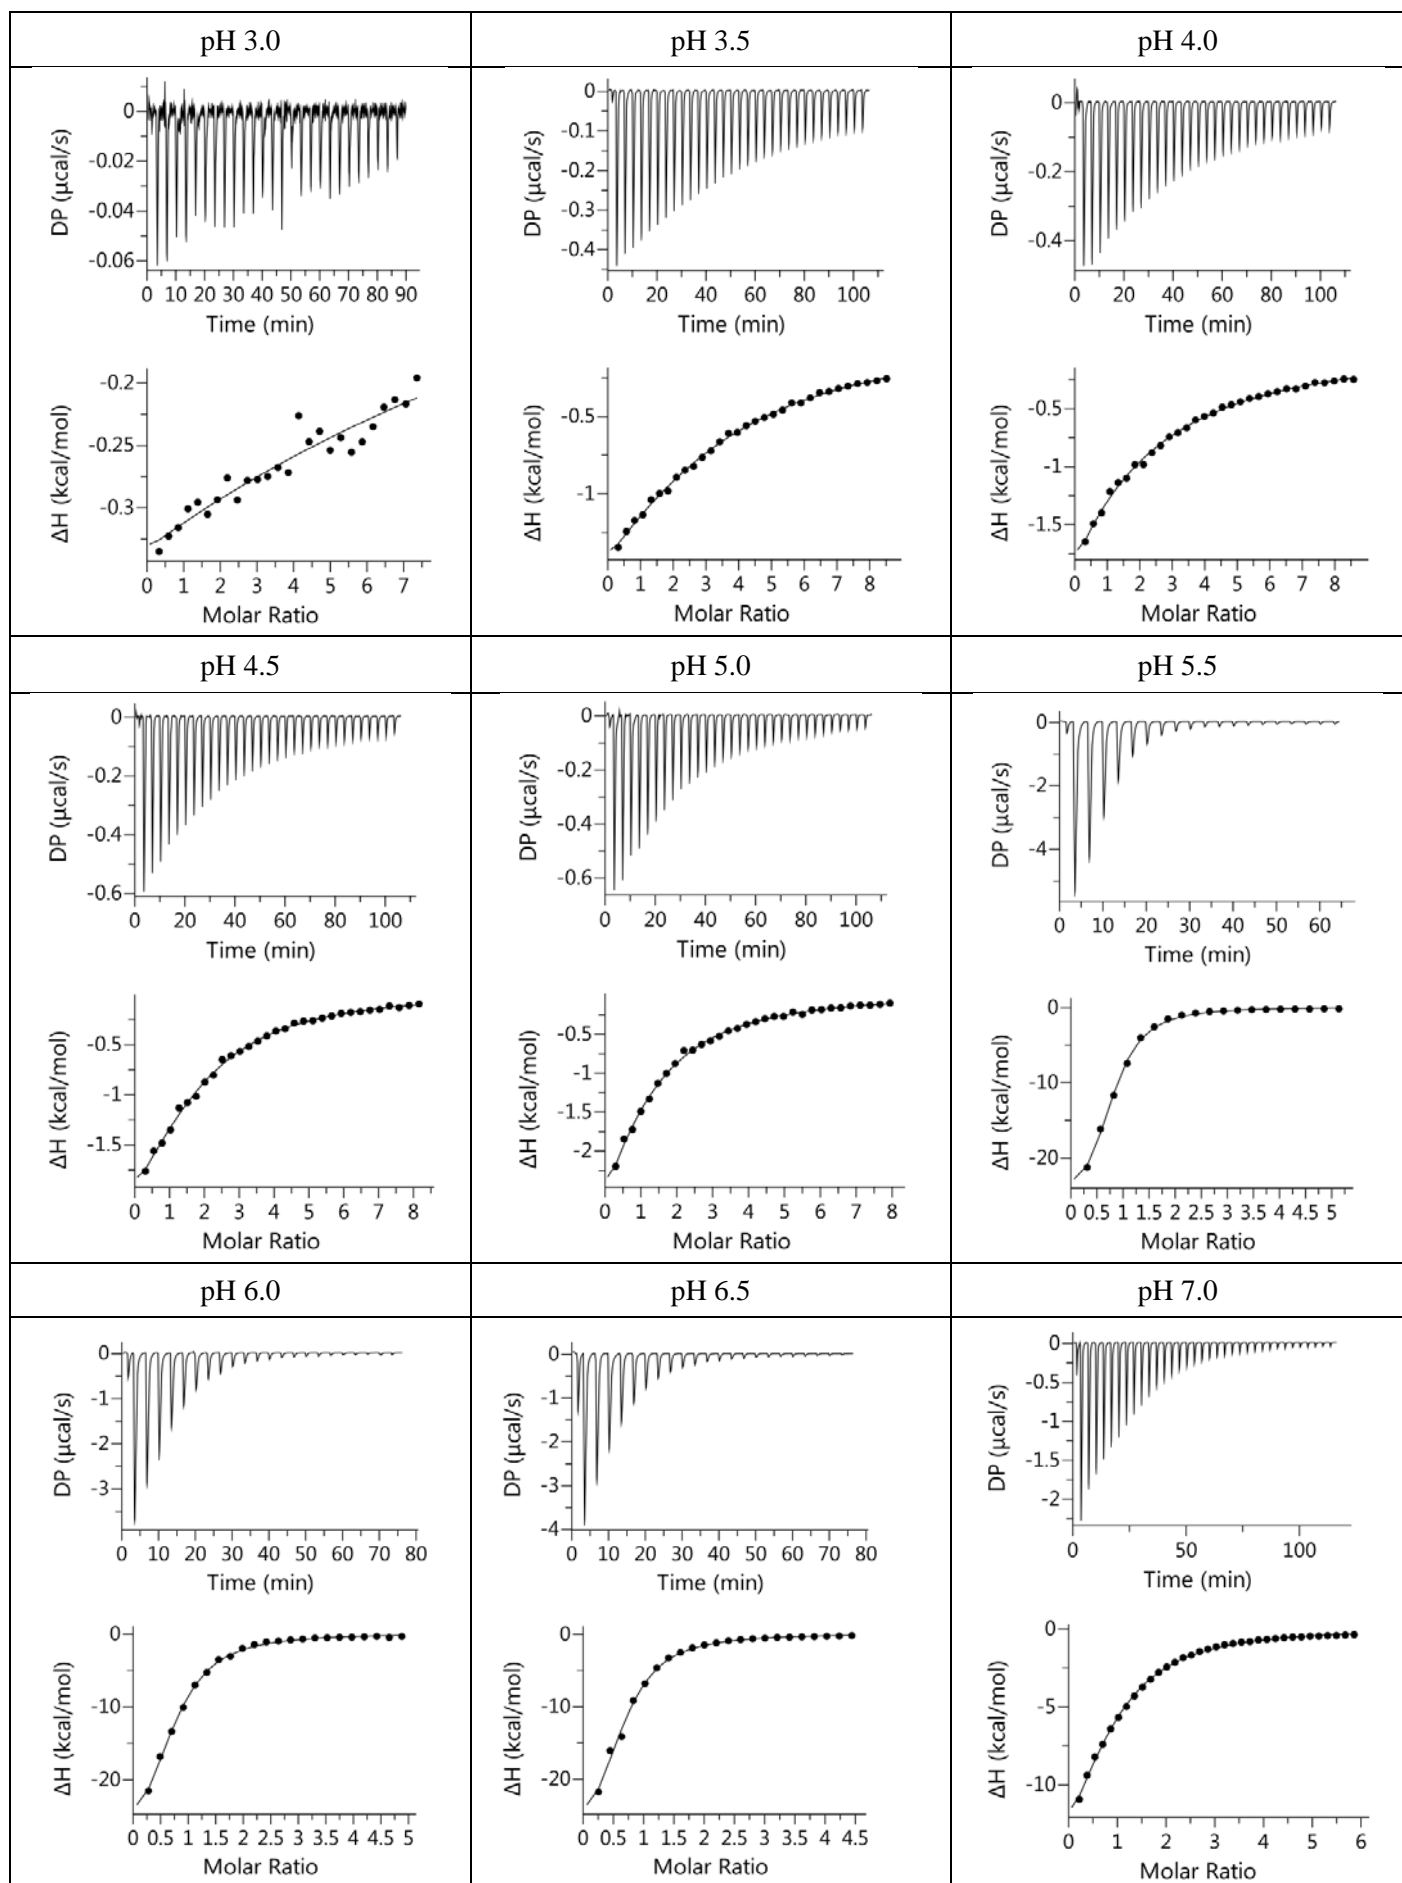

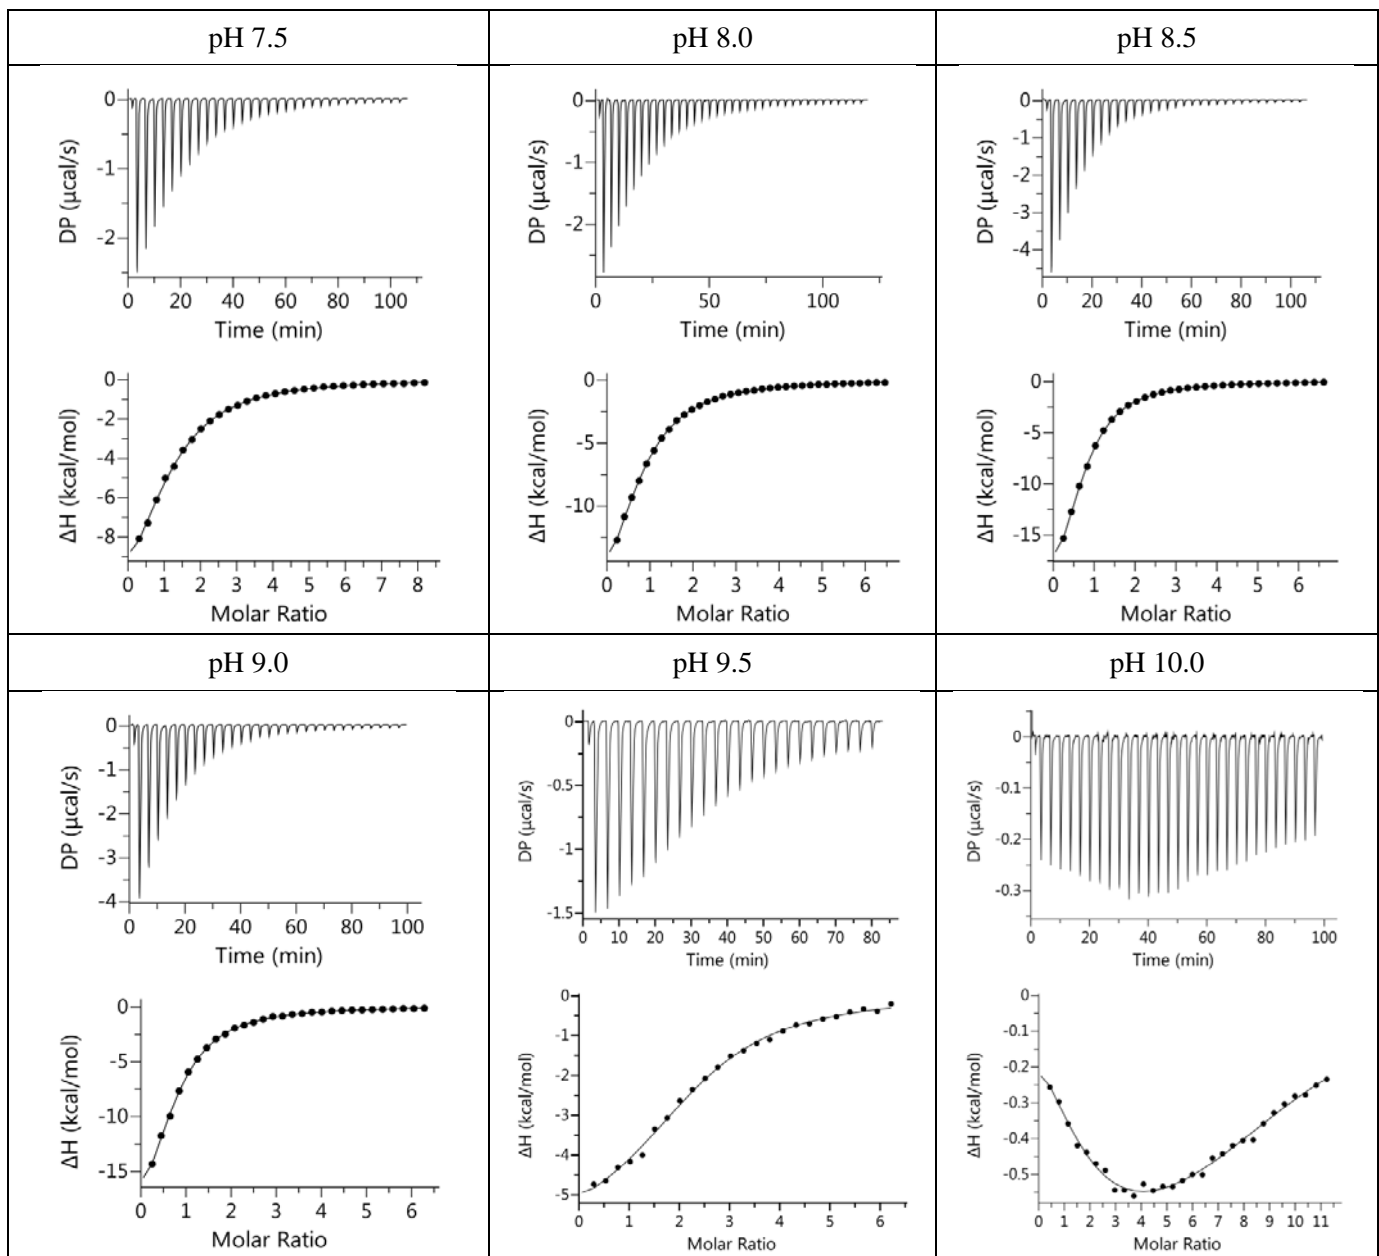

# Citrate recognition by McpQ-LBD

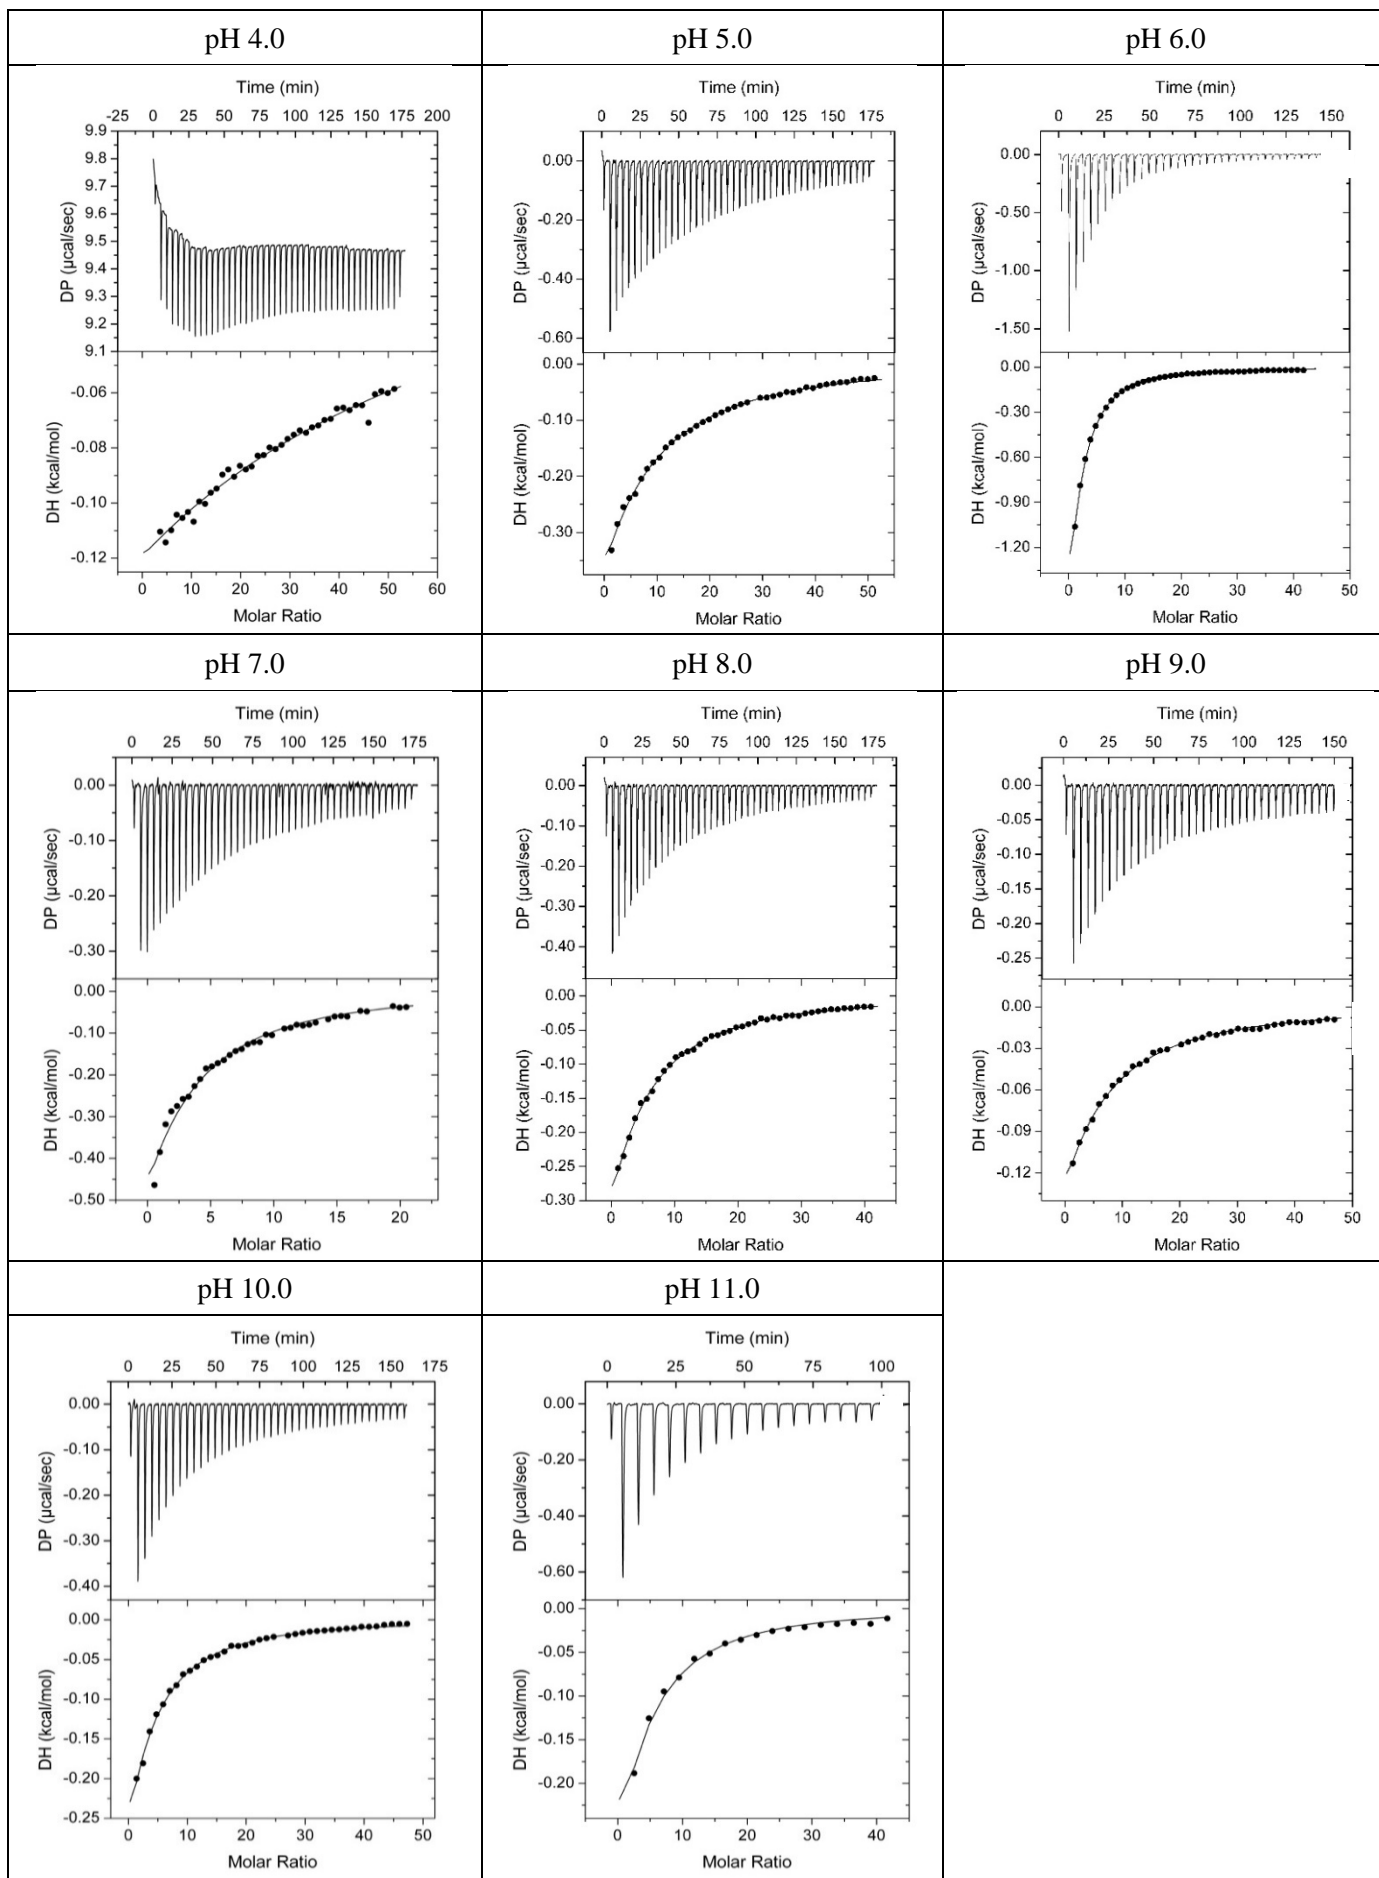

Supplement: mbio.01650-22-s0006.pdf [file mbio.01650-22-s0006.pdf]
