# Supplementary material for: The pH Robustness of Bacterial Sensing
Source: PubMed Central journal article supplement (PMC9600550; doi:10.1128/mbio.01650-22), 2022-09-26

**Fig. S3. Microcalorimetric titrations of solute binding proteins and cytosolic ligand-binding domains with ligands at different pH.**

**D-maltose recognition by the maltose binding protein (MBP)**

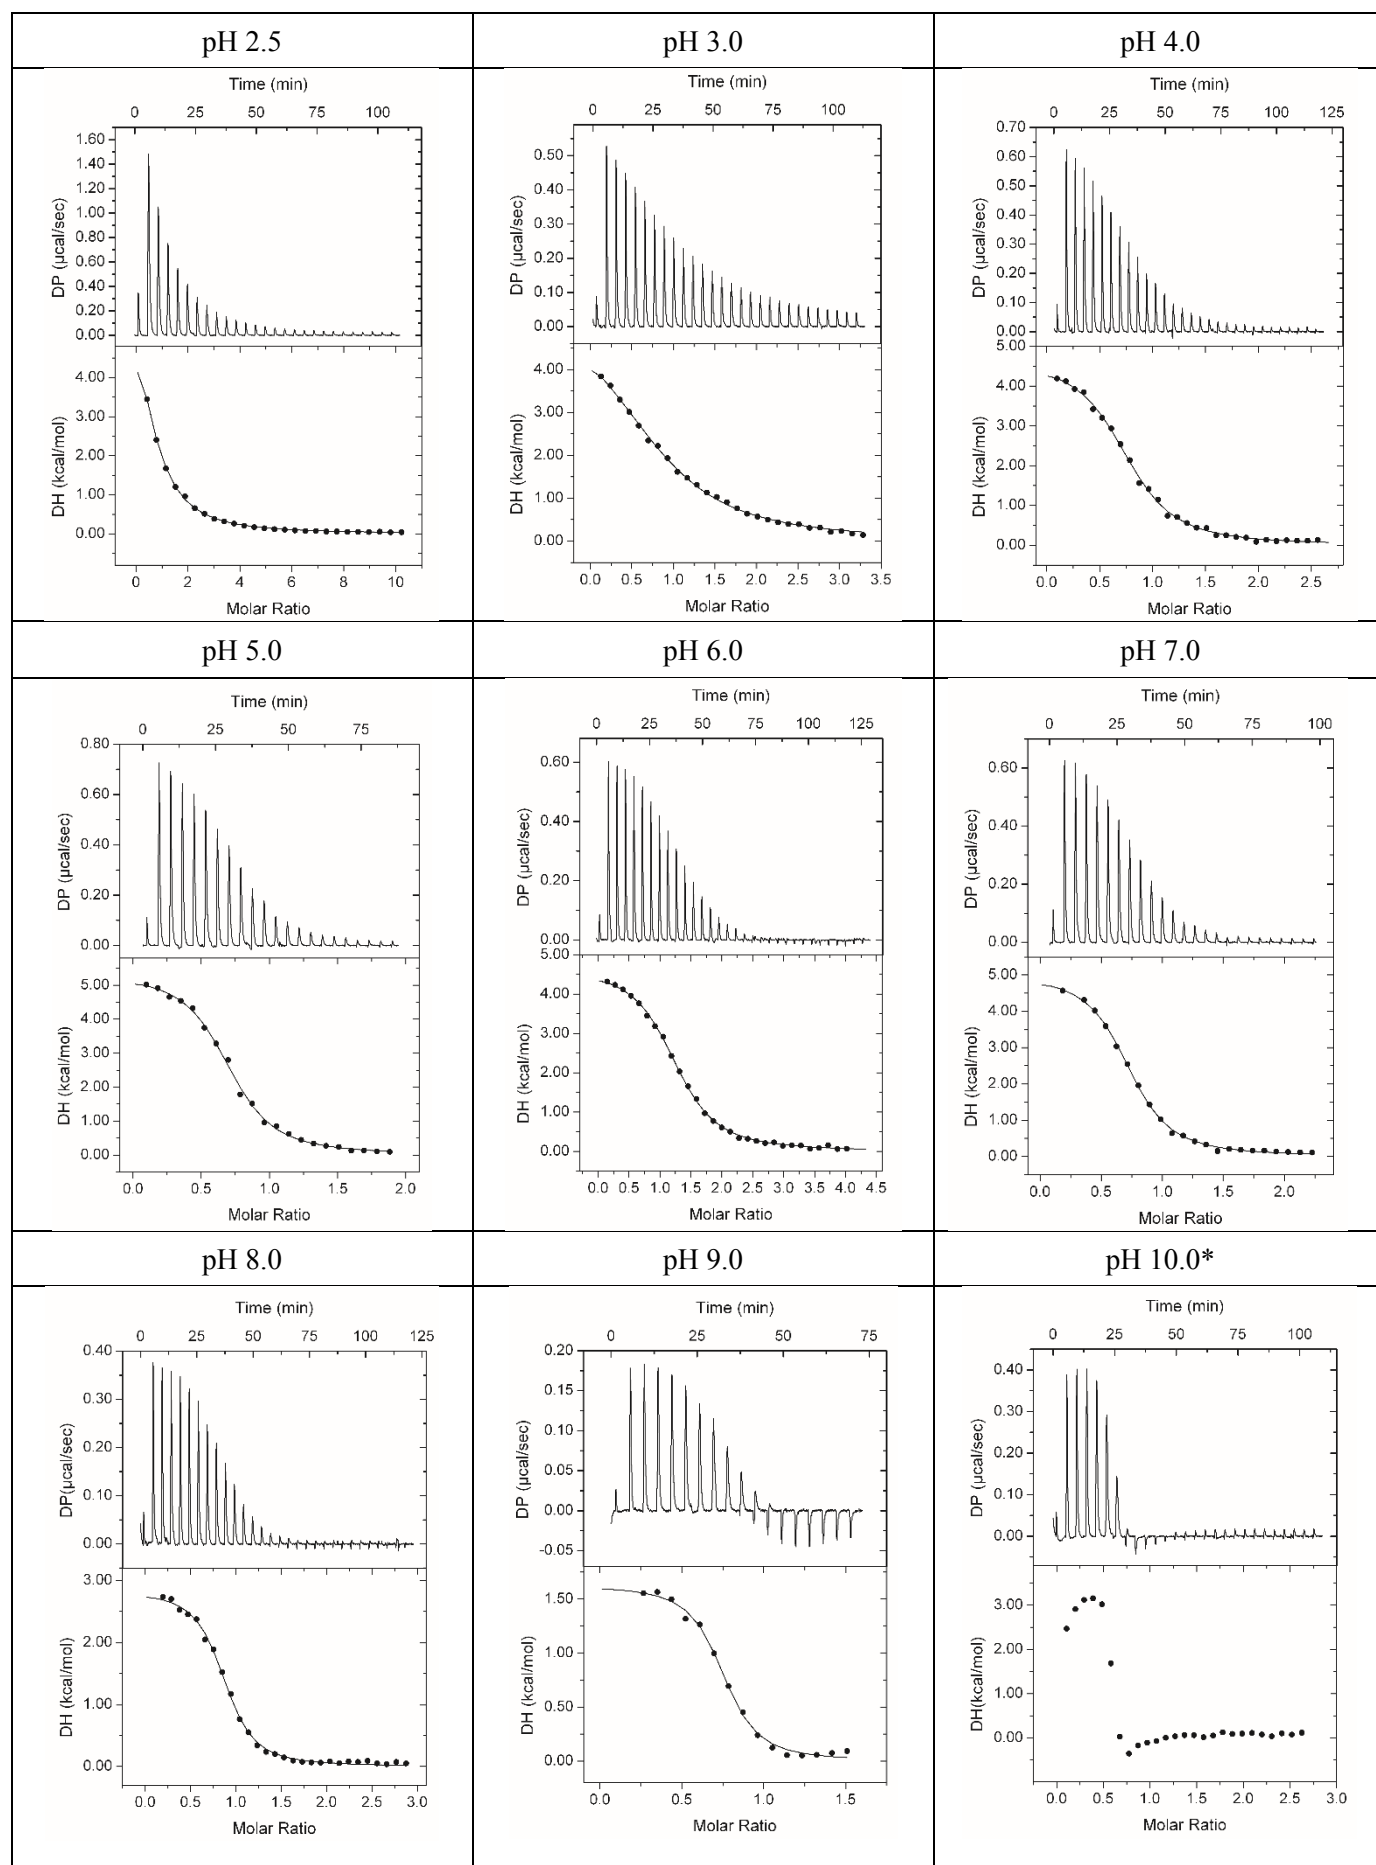

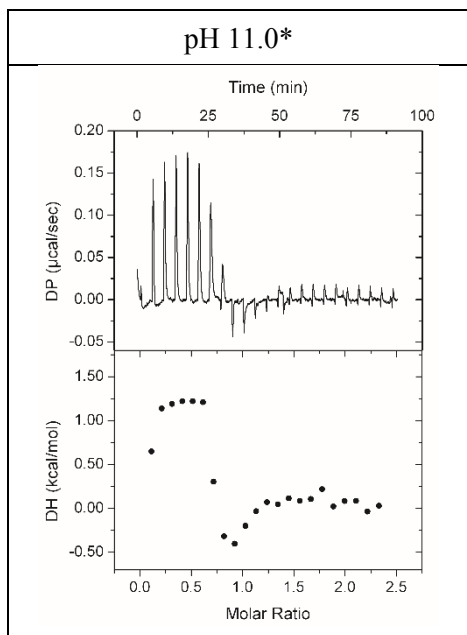

\* Data could not be analysed in a satisfactory manner. There was a rapid transition from binding to saturation, indicative of a high-affinity binding. This binding was therefore defined as  $K_D$  below 1  $\mu\text{M}$ .

# L-ornithine recognition by E6B08\_RS28125

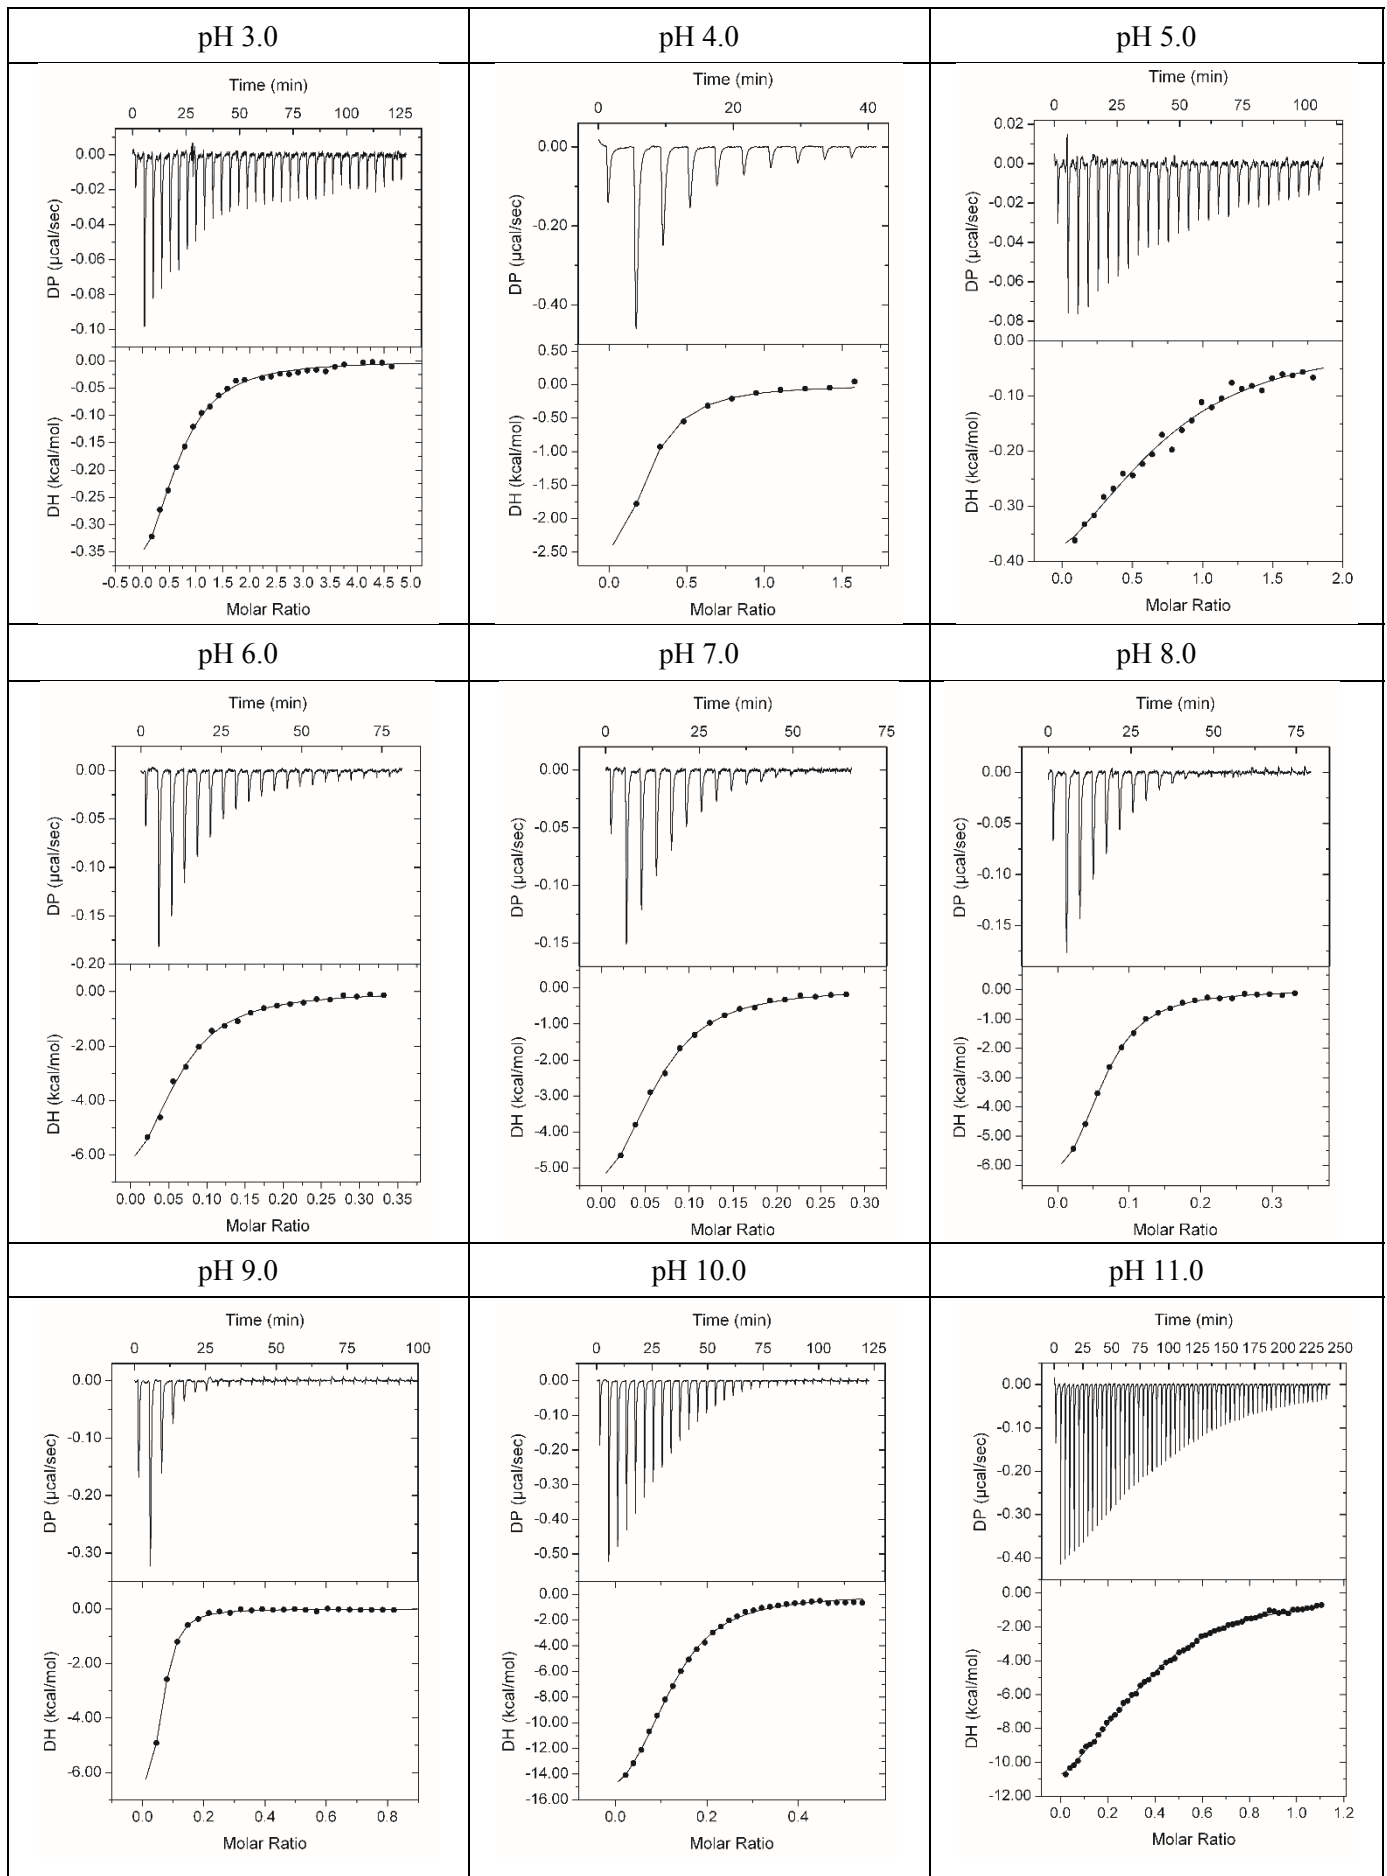

# Toluene recognition by TodS-Nter

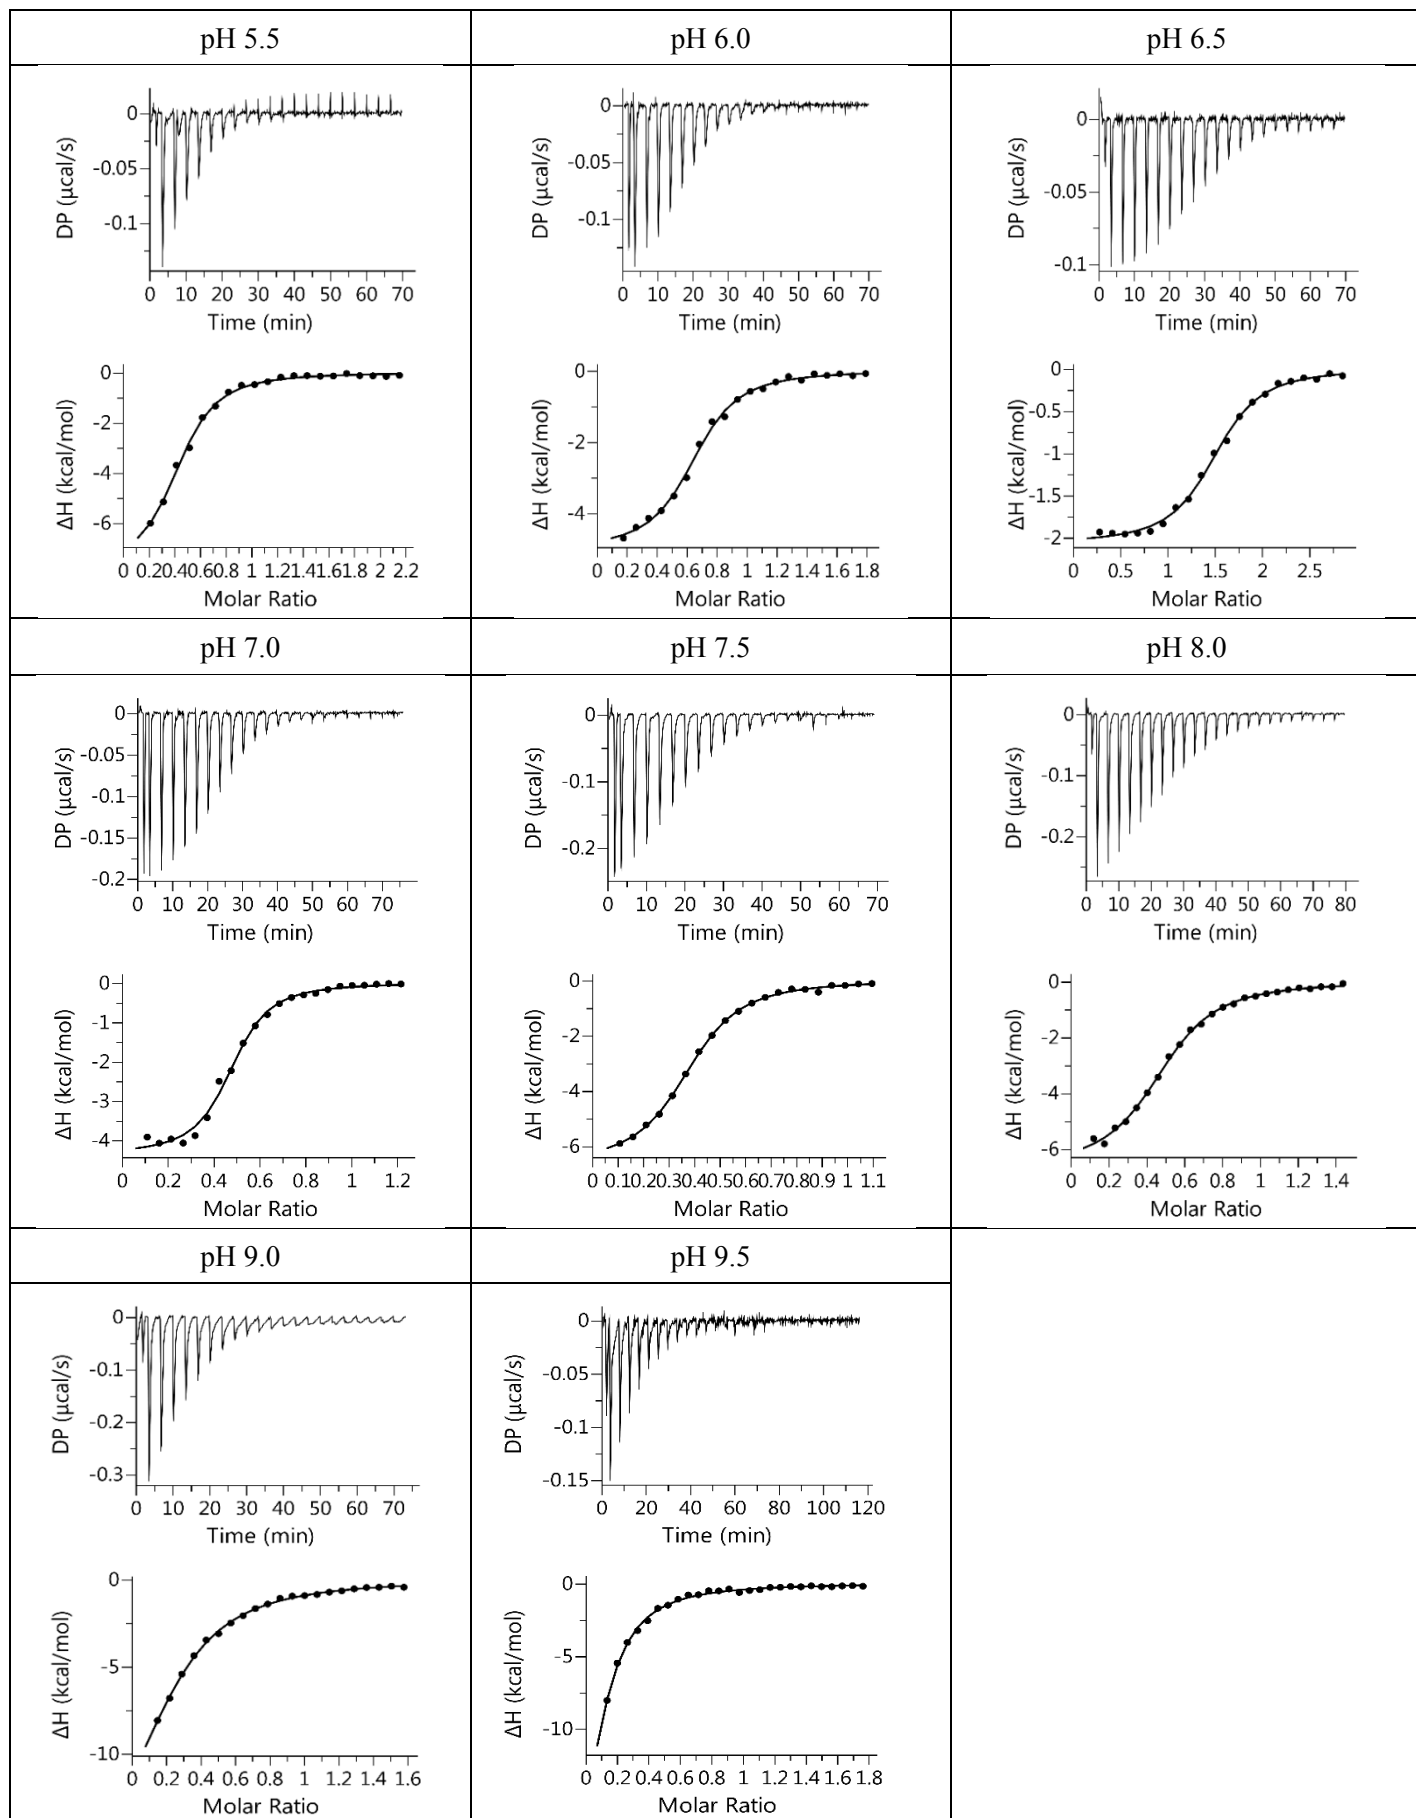

# Indole-3-pyruvic acid recognition by AdmX-LBD

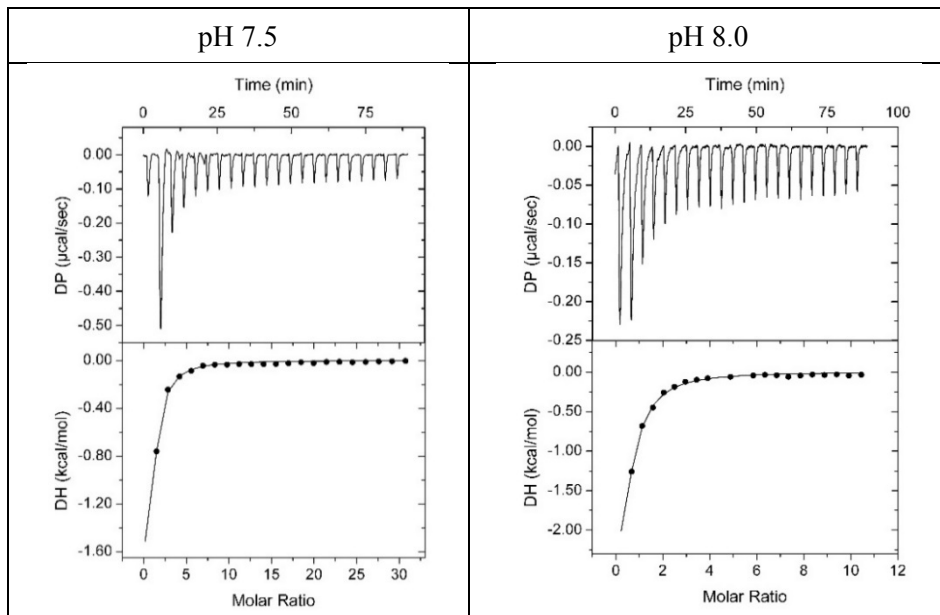

# Benzonitrile recognition by TtgV

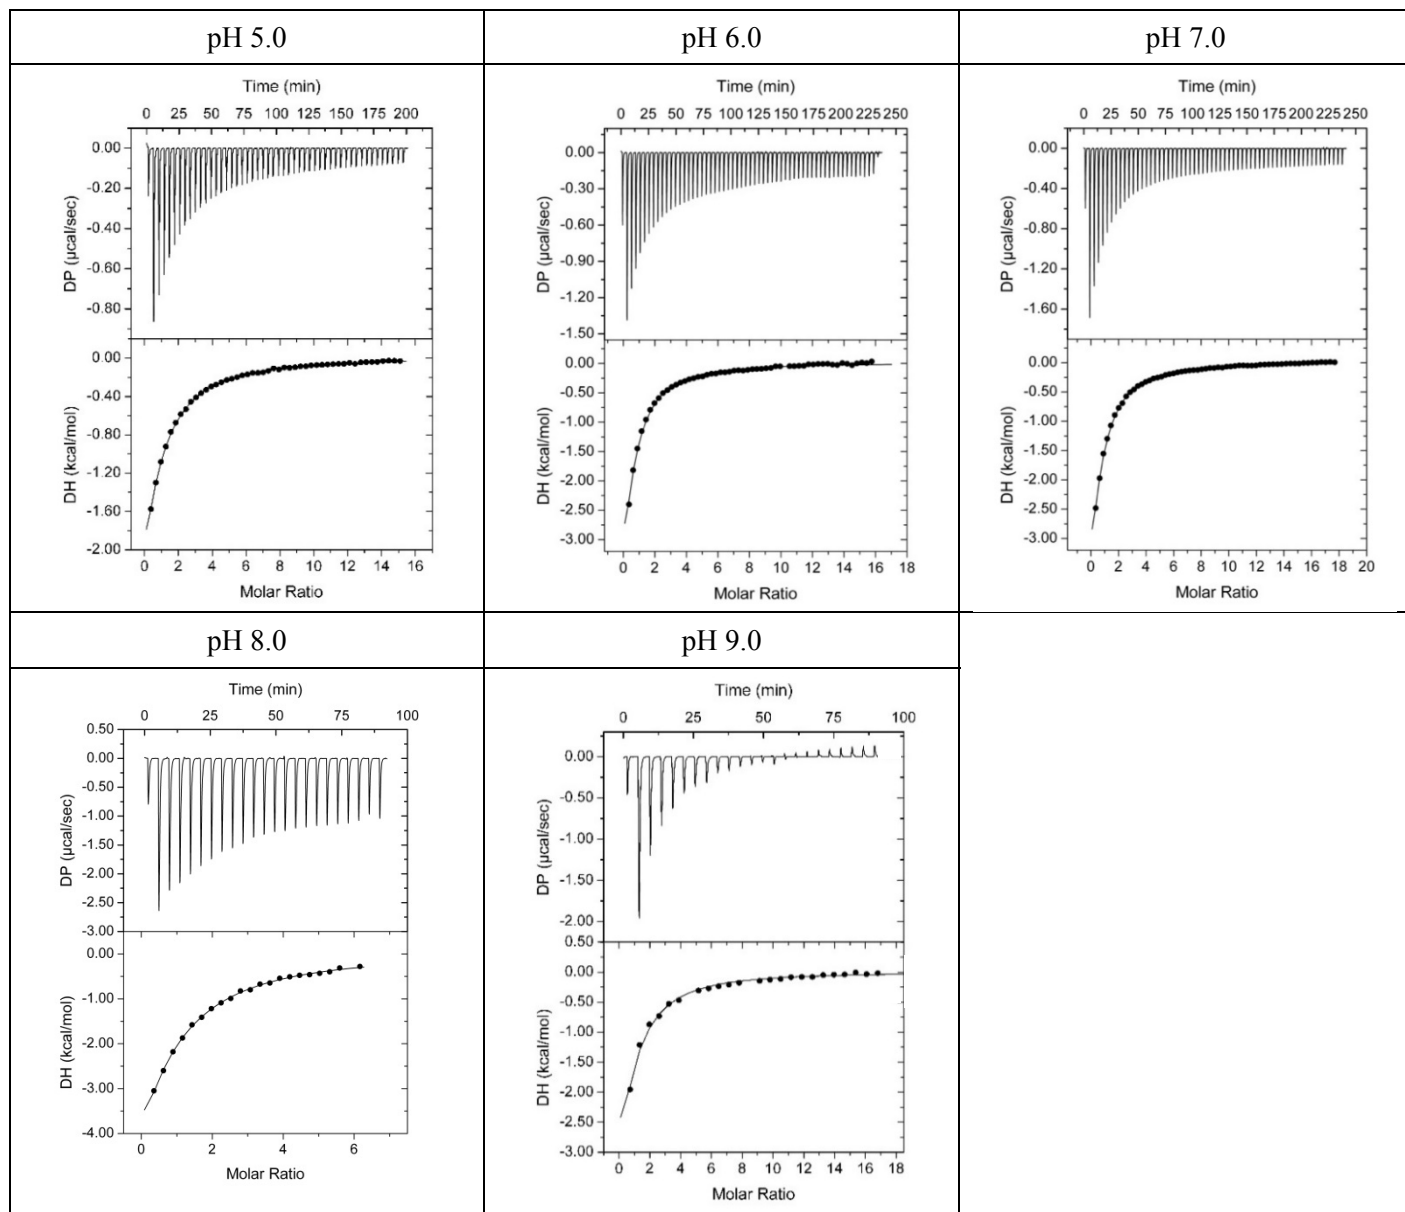

Supplement: mbio.01650-22-s0007.pdf [file mbio.01650-22-s0007.pdf]
